1  
2  
3  
4  
5  
6  
7  
8  
9  
10  
11  
12  
13  
14  
15  
16  
17  
18  
19  
20  
21  
22  
23  
24  
25  
26  
27  
28  
29  
30

## **Molecular Evolution of *Pseudomonas syringae* Type III Secreted Effector Proteins**

Marcus M. Dillon<sup>a</sup>, Renan N.D. Almeida<sup>a</sup>, Bradley Laflamme<sup>a</sup>, Alexandre Martel<sup>a</sup>, Bevan S. Weir<sup>c</sup>,  
Darrell Desveaux<sup>a</sup>, and David S. Guttman<sup>a,b</sup>

<sup>a</sup> Department of Cell & Systems Biology, University of Toronto, 25 Willcocks St., Toronto, Ontario,  
Canada

<sup>b</sup> Centre for the Analysis of Genome Evolution & Function, University of Toronto, Toronto, Ontario,  
Canada

<sup>c</sup> Landcare Research, Auckland, New Zealand

### **Corresponding Author:**

David S. Guttman  
25 Willcocks St., ESC 4033  
Toronto, ON M5S 3B2  
Phone: 905-914-8316  
Email: david.guttman@utoronto.ca

Running Title: Type III Secreted Effectors in *Pseudomonas syringae*

Keywords: *Pseudomonas syringae*, type III secreted effectors, type III secretion system, plant-pathogen, host-microbe interactions, virulence, immunity

31 **ABSTRACT**

32

33 Diverse Gram-negative pathogens like *Pseudomonas syringae* employ type III secreted effector (T3SE)  
34 proteins as primary virulence factors that combat host immunity and promote disease. T3SEs can also  
35 be recognized by plant hosts and activate an effector triggered immune (ETI) response that shifts the  
36 interaction back towards plant immunity. Consequently, T3SEs are pivotal in determining the virulence  
37 potential of individual *P. syringae* strains, and ultimately restrict *P. syringae* pathogens to a subset of  
38 potential hosts that are unable to recognize their repertoires of T3SEs. While a number of effector  
39 families are known to be present in the *P. syringae* species complex, one of the most persistent  
40 challenges has been documenting the complex variation in T3SE contents across a diverse collection  
41 of strains. Using the entire pan-genome of 494 *P. syringae* strains isolated from more than 100 hosts,  
42 we conducted a global analysis of all known and putative T3SEs. We identified a total of 14,613 T3SEs,  
43 4,636 of which were unique at the amino acid level, and show that T3SE repertoires of different *P.*  
44 *syringae* strains vary dramatically, even among strains isolated from the same hosts. We also find that  
45 dramatic diversification has occurred within many T3SE families, and in many cases find strong  
46 signatures of positive selection. Furthermore, we identify multiple gene gain and loss events for several  
47 families, demonstrating an important role of horizontal gene transfer (HGT) in the evolution of *P.*  
48 *syringae* T3SEs. These analyses provide insight into the evolutionary history of *P. syringae* T3SEs as  
49 they co-evolve with the host immune system, and dramatically expand the database of *P. syringae*  
50 T3SEs alleles.

## 51 INTRODUCTION

52  
53 Over the past three decades, type III secreted effectors (T3SEs) have been recognized as primary  
54 mediators of many host-microbe interactions (Michiels and Cornelis, 1991;Salmond and Reeves,  
55 1993;Hueck, 1998;Coburn et al., 2007;Deng et al., 2017;Hu et al., 2017;Rapisarda and Fronzes, 2018).  
56 These proteins are translocated directly from the pathogen cell into the host cytoplasm by the type III  
57 secretion system (T3SS), where they perform a variety of functions that generally promote virulence  
58 and suppress host immunity (Zhou and Chai, 2008;Cunnac et al., 2009;Oh et al., 2010;Buttner,  
59 2016;Khan et al., 2018)}(Coburn et al., 2007). However, T3SEs can also be recognized by the host  
60 immune system, which allows the host to challenge the invading microbe. In plants, this immune  
61 response is called effector triggered immunity (ETI) (Jones and Dangl, 2006;Dodds and Rathjen,  
62 2010;Khan et al., 2016). The interaction between pathogen T3SEs and the host immune system results  
63 in an evolutionary arms race, where pathogen T3SEs evolve to avoid detection while still maintaining  
64 their role in the virulence process, and the host immune system evolves to recognize the diversity of  
65 T3SEs and their actions, while maintaining a clear distinction between self and non-self to avoid  
66 autoimmune activation.

67  
68 One of the best studied arsenals of T3SEs is carried by the plant pathogenic bacterium *Pseudomonas*  
69 *syringae* (Lindeberg et al., 2009;2012;Mansfield et al., 2012). *Pseudomonas syringae* is a highly  
70 diverse plant pathogenic species complex responsible for a wide-range of diseases on many  
71 agronomically important crop species (Mansfield et al., 2012). While the species as a whole has a very  
72 broad host range, individual strains can only cause disease on a small range of plant hosts (Sarkar et  
73 al., 2006;Lindeberg et al., 2009;Baltrus et al., 2017;Xin et al., 2018). A growing number of *P. syringae*  
74 strains have also recently been recovered from non-agricultural habitats, including wild plants, soil,  
75 lakes, rainwater, snow, and clouds (Morris et al., 2007;Morris et al., 2008;Clarke et al., 2010;Morris et  
76 al., 2013) . This expanding collection of strains and the increased availability of comparative genomics  
77 data presents unique opportunities for obtaining insight into the determinants of host specificity in *P.*  
78 *syringae* (Baltrus et al., 2011;O'Brien et al., 2011;Baltrus et al., 2012;O'Brien et al., 2012;Dillon et al.,  
79 2017).

80  
81 *Pseudomonas syringae* T3SEs have been the focus of both fundamental and applied plant pathology  
82 research for decades, going back to some of the early work on gene-for-gene resistance and avirulence  
83 proteins (Mukherjee et al., 1966;Staskawicz et al., 1984;Staskawicz et al., 1987;Keen and Staskawicz,  
84 1988;Kobayashi et al., 1989;Keen, 1990;Jenner et al., 1991;Fillingham et al., 1992). Since then, over  
85 1000 publications have focused on *P. syringae* T3SEs (Web of Science ["*Pseudomonas syringae*" AND  
86 (avirulence OR ("type III" AND effector))], October 2018), making it one of the most comprehensively

87 studied T3SE systems. To date a total of 66 T3SE families and 764 T3SE alleles have been catalogued  
88 in the *Pseudomonas syringae* Genome Resources Homepage (<https://pseudomonas-syringae.org>).  
89 Many of these T3SE families are small, relatively conserved, and only distributed in a subset of *P.*  
90 *syringae* strains, while others are more diverse and distributed across the majority of sequenced *P.*  
91 *syringae* strains (Baltrus et al., 2011; O'Brien et al., 2011; Dillon et al., 2017). Given the irregular  
92 distribution of T3SEs among strains and their frequent association with mobile genetic elements, it has  
93 long been recognized that horizontal transfer plays an important role in the dissemination of T3SEs  
94 among strains (Kim and Alfano, 2002; Rohmer et al., 2004; Stavriniades and Guttman, 2004; Lovell et al.,  
95 2009; Godfrey et al., 2011; Lovell et al., 2011; Neale et al., 2016). Nucleotide composition and  
96 phylogenetic analyses of a subset of T3SEs identified eleven *P. syringae* T3SE families that were  
97 acquired by recent horizontal transfer events. However, the remaining thirteen families appeared to be  
98 ancestral and vertically inherited, suggesting that there is also an important role for pathoadaptation in  
99 the evolution of T3SEs (Rohmer et al., 2004; Stavriniades et al., 2006; O'Brien et al., 2011). While T3SE  
100 repertoires are thought to be key determinants of host specificity, strains with divergent repertoires are  
101 at times capable of causing disease on the same host (Almeida et al., 2009; O'Brien et al.,  
102 2011; Lindeberg et al., 2012; O'Brien et al., 2012), signifying that we have much to learn about the ways  
103 in which T3SEs contribute to *P. syringae* virulence.

104  
105 Two major issues impact our current understanding of T3SE diversity in *P. syringae*: sampling bias and  
106 nomenclature. The current catalogue of T3SEs listed on the *Pseudomonas syringae* Genome  
107 Resources Homepage come from approximately 120 strains that represent only a subset of the  
108 phylogroups in the *P. syringae* species complex. Expanding this strain collection to a more diverse set  
109 will undoubtedly expand our understanding of diversity within T3SE families and reveal as-yet identified  
110 families. Another persistent issue in *P. syringae* comparative genomics has been the lack of benchmark  
111 standards for naming and assigning new T3SEs. While a standardized set of criteria for the  
112 identification and naming of *P. syringae* T3SEs have been published and broadly accepted (Lindeberg  
113 et al., 2005), the recommendation that new candidate T3SEs be subjected to rigorous phylogenetic  
114 analyses prior to family designation has not always been consistently employed. While this problem is  
115 not nearly as interesting from a biological perspective, it is very important operationally, since poor  
116 classification and naming practices can lead to substantial confusion and even spurious conclusions.  
117 Part of this issue stems from the fact that T3SEs are multidomain proteins that can share homology  
118 with multiple divergent T3SE families (Stavriniades et al., 2006; McCann and Guttman, 2008). At the time  
119 of their discovery, many families also had fewer than three T3SE alleles, making robust phylogenetic  
120 analyses impossible. Whatever the root cause, we are currently in a situation where many T3SEs are  
121 annotated without family assignment, some very similar T3SEs have been assigned to different T3SE  
122 families, and some highly divergent T3SEs are assigned to the same family based on short tracts of

123 local similarity. This situation should be rectified in order to facilitate more comprehensive analyses of  
124 the role of T3SEs in the outcomes of host-pathogen interactions, particularly in light of the growing  
125 database of *P. syringae* genomics resources.

126  
127 Here, we present an expanded catalogue of T3SEs in *P. syringae* and an updated phylogenetic  
128 analysis of the diversity within each T3SE family. We identified a total of 14,613 T3SEs from 494 *P.*  
129 *syringae* whole-genomes that include strains from 11 of the 13 *P. syringae* species complex  
130 phylogroups. These strains allowed us to redefine evolutionarily distinct family barriers for T3SEs,  
131 examine the distribution of each family across the *P. syringae* species complex, quantify the diversity  
132 within each T3SE family, and explore how T3SEs are inherited. By expanding and diversifying the  
133 database of confirmed and predicted *P. syringae* T3SEs and placing all alleles in an appropriate  
134 phylogenetic context, these analyses will ultimately enable more comprehensive studies of the roles of  
135 individual T3SEs in pathogenicity and allow us to more effectively explore the contribution of T3SEs to  
136 host specificity.

137

138

## 139 **METHODS**

140

### 141 **Genome Sequencing, Assembly, and Gene Identification**

142 Four hundred and ninety-four *P. syringae* species complex strains were analyzed (Supplemental  
143 Dataset S1), of which 102 assemblies were obtained from public sequence databases, including  
144 NCBI/GenBank, JGI/IMG-ER, and PATRIC (Markowitz et al., 2012; Wattam et al., 2014; Coordinators,  
145 2018), and 392 strains were sequenced in house by the University of Toronto Center for the Analysis of  
146 Genome Evolution and Function (CAGEF). Two hundred and sixty-eight of these sequenced strains  
147 were provided by the International Collection of Microorganisms from Plants (ICMP). For the strains  
148 sequenced by CAGEF, DNA was isolated using the Gentra Puregene Yeast and Bacteria Kit (Qiagen,  
149 MD, USA), and purified DNA was then suspended in TE buffer and quantified with the Qubit dsDNA BR  
150 Assay Kit (ThermoFisher Scientific, NY, USA). Paired-end libraries were generated using the Illumina  
151 Nextera XT DNA Library Prep Kit following the manufacturer's instructions (Illumina, CA, USA), with 96-  
152 way multiplexed indices and an average insert size of ~400 bps. All sequencing was performed on  
153 either the Illumina MiSeq or GAIIx platform using V2 chemistry (300 cycles). Following sequencing,  
154 read quality was assessed with FastQC v.0.11.5 (Andrews, 2010) and low-quality bases and adapters  
155 were trimmed using Trimmomatic v0.36 (Bolger et al., 2014) (ILLUMINACLIP: NexteraPE-PE.fa,  
156 Maximum Mismatch = 2, PE Palindrome Match = 30, Adapter Read Match = 10, Maximum Adapter  
157 Length = 8; SLIDINGWINDOW: Window Size = 4, Average Quality = 5; MENLEN = 20). All genomes  
158 were then *de novo* assembled into contigs with CLC v4.2 (Mode = fb, Distance mode = ss, Minimum

159 Read Distance = 180, Maximum Read Distance = 250, Minimum Contig Length = 1000). Raw reads  
160 were then re-mapped to the remaining contigs using samtools v1.5 with default settings to calculate the  
161 read coverage for each contig (Li and Durbin, 2009). Any contigs with a coverage depth of less than the  
162 average contig coverage by more than two standard deviations were filtered out of the assembly.  
163 Finally, gene prediction was performed on each genome using Prodigal v2.6.3 with default settings  
164 (Hyatt et al., 2010).

### 165 166 **Annotation and Family Delimitation of Type III Secreted Effectors**

167 To characterize the effector repertoire of each of the 494 *P. syringae* species used in this study, we first  
168 downloaded all available *P. syringae* effector, helper, and chaperone sequences from three public  
169 databases: NCBI (18,120) (<https://www.ncbi.nlm.nih.gov>), Bean 2.0 (225) (Dong et al., 2015), and the  
170 *Pseudomonas syringae* Genome Resources Homepage (843) (<https://pseudomonas-syringae.org>).  
171 Using this database of 19,188 T3SE associated sequences in *P. syringae*, we then performed a  
172 BLASTP analysis to ensure that all sequences that we downloaded were assigned to appropriate  
173 families, which was essential given that many of the sequences downloaded from NCBI are  
174 ambiguously labelled as “type III effectors”, “type III helpers”, or “type III chaperones”. Any unassigned  
175 T3SE associated gene that had significant reciprocal blast hits ( $E < 1e-24$ ) with an assigned T3SE  
176 associated gene was assigned to the corresponding family. This strict E-value cutoff was chosen to  
177 avoid incorrectly assigning families to sequences based on short-tracts of similarity that are common in  
178 the N-terminal region of T3SEs from different families (Stavrinos et al., 2006). Sequences that had  
179 reciprocal significant hits from multiple families were assigned to the family where they had more  
180 significant hits, which means that smaller families could be dissolved into a larger family if all  
181 sequences from the two families were sufficiently similar. However, this only occurred in one case,  
182 which resulted in all HopBB sequences being dissolved into the HopF family. In sum, our final seed  
183 database of *P. syringae* T3SEs contained a total of 7,974 effector alleles from 66 independent families,  
184 1,585 discontinued effector alleles from 6 independent families, 2,230 helper alleles from 23  
185 independent families, and 1,569 chaperones alleles from 10 independent families. Any sequences that  
186 were not able to be assigned to an appropriate T3SE family were discarded because of the possibility  
187 that these are not true T3SE associated genes.

188  
189 Using the T3SE seed database, which contained a total of 7,974 effector alleles, we then annotated  
190 any predicted genes in each of the *P. syringae* genomes as a T3SE if the gene had a significant blast  
191 hit ( $E < 1e-24$ ) in the T3SE seed database. This resulted in the annotation of 14,613 T3SEs across the  
192 494 *P. syringae* strains. Family names were initially assigned to these T3SEs based on the name that  
193 had been assigned to the hit T3SE in the seed database. However, a meaningful comparative analysis  
194 of the distribution and evolution of the different T3SE families across the *P. syringae* species complex



195 requires that we employ consistent definitions for delimiting each T3SE family. This has been  
196 historically problematic with *P. syringae* T3SEs because inconsistent criteria have been employed for  
197 assigning novel families. Therefore, we took all 14,613 T3SEs that were identified in this study and  
198 used an all-vs-all BLAST clustering approach to delimit them into new families with consistent criteria.  
199  
200 First, we blasted each T3SE amino acid sequence against a database of all 14,613 T3SEs and retained  
201 only hits that an E-value of less than 1e-24 and a length that covered at least 60% of the shorter  
202 sequence. Sequences that had multiple non-contiguous hits (i.e. high-scoring segment pairs) with an e-  
203 value less than 1e-24 whose cumulative lengths covered at least 60% of the shorter sequence were  
204 also retained. As was the case above, the strict e-value cutoff prevents us from assigning significant  
205 hits between T3SE sequences that only share strong local identity, which is most commonly seen in the  
206 N-terminal secretion signal. The 60% length cutoff prevents chimeric T3SEs from linking the two  
207 unrelated T3SE families that combined to form the chimera.  
208  
209 Second, a final list of all T3SE pairs that shared significant hits was gathered and T3SE sequences  
210 were collectively binned based on their similarity relationships. With this method, T3SE families were  
211 built based on all-by-all pairwise similarity between T3SEs rather than the similarity between individual  
212 T3SEs and an arbitrary seed T3SE or collection of centroid T3SEs, as is the case with some clustering  
213 methods. Significantly, our approach binned all significantly similar T3SE regardless of whether any two  
214 T3SEs were connected through direct or transitive similarity. For example, if T3SE sequence A was  
215 significantly similar to T3SE sequence B, and sequence B was significantly similar to sequence C, all  
216 three sequences would be binned together, regardless of whether there was significant similarity  
217 between sequence A and sequence C. This is important for appropriately clustering particularly diverse  
218 T3SE families, which may contain highly divergent alleles that have intermediate variants.  
219  
220 Finally, we assigned the same T3SE family designation to all T3SEs within each cluster based on the  
221 most commonly assigned T3SE family name that had initially been assigned to sequences within that  
222 cluster. In the majority of cases, all sequences in a single cluster had the same initially assigned T3SE  
223 family. However, for cases where there were multiple family names assigned to sequences within a  
224 single cluster, the lower Hop designation (ie. HopC < HopD) was assigned to all sequences in the  
225 cluster. Conversely, for cases where T3SEs that had initially been assigned the same family  
226 designation formed two separate clusters, T3SEs from the larger cluster were assigned the initial family  
227 name, and T3SEs from the smaller cluster(s) were assigned a novel family name, starting with HopBO,  
228 which is the first available Hop designation. Ultimately, this method allowed us to effectively delimit all  
229 T3SEs in this dataset into separate families with consistent definitions and performed considerably  
230 better at partitioning established T3SE families than standard orthology delimitation software like

231 PorthoMCL (Tabari and Su, 2017) (Supplemental Dataset S2), likely because of the widespread  
232 presence of chimeric T3SEs in the *P. syringae* species complex.

233

234 In order to classify short chimeric relationships between families, as illustrated in Figure 2, we used a  
235 similar approach to the one outlined above. Specifically, we parsed our reciprocal BLASTP results to  
236 capture hits that occurred between alleles that had been assigned to different families. Here, we  
237 determined there to be a significant overlap between the alleles if there was an E-value  $< 1e-10$ , with  
238 no length limitation. These local relationships between some alleles in distinct families have no bearing  
239 on the evolutionary analyses performed in this study, but are highlighted in Figure 2, where the length  
240 of the alleles and their overlapping regions is proportional to the lengths of a pair of representative  
241 alleles from the two families.

242

### 243 **Phylogenetic Analyses**

244 We generated three separate phylogenetic trees in this study to ask whether core-genome diversity,  
245 pan-genome content, or effector content could effectively sort *P. syringae* strains based on their host of  
246 isolation. For the core genome tree, we clustered all protein sequences from the 494 *P. syringae*  
247 genomes used in this study into ortholog families using PorthoMCL v3 with default settings (Tabari and  
248 Su, 2017). All ortholog families that were present in at least 95% of the *P. syringae* strains in our  
249 dataset were considered part of the soft-core genome and each of these families was independently  
250 aligned using MUSCLE v3.8.31 with default settings (Edgar, 2004). These alignments were then  
251 concatenated end-to-end using a custom python script and a maximum likelihood phylogenetic tree  
252 was constructed based on the concatenated alignment using FastTree v2.1.10 with default parameters  
253 (Price et al., 2010). For the pan-genome tree, we generated a binary presence-absence matrix for all  
254 ortholog families that were present in more than one *P. syringae* strain. This presence-absence matrix  
255 was used to compute a distance matrix in R v3.3.1 using the “dist” function with the Euclidean distance  
256 method. The phylogenetic tree was then constructed using the “hclust” function with the complete  
257 linkage hierarchical clustering method. We used the same approach to generate the effector content  
258 tree, except the input binary presence-absence matrix contained information on the 70 effector families  
259 rather than all ortholog families that made up the *P. syringae* pan-genome.

260

### 261 **Estimating Pairwise $K_a$ , $K_s$ , and $K_a/K_s$**

262 Evolutionary rate parameters were calculated independently for each T3SE family. First, amino acid  
263 sequences were multiple aligned with MUSCLE v.3.8.31 using default settings (Edgar, 2004). Each  
264 multiple alignment was then reverse translated based on the corresponding nucleotide sequences  
265 using RevTrans v1.4 (Wernersson and Pedersen, 2003) and all pairwise  $K_a$  and  $K_s$  values were  
266 calculated for each family using the Nei-Gojobori Method, implemented by MEGA7-CC (Kumar et al.,



267 2016). Output files were parsed using custom python scripts to convert the *Ka* and *Ks* matrices to  
268 stacked data frames with four columns: Sequence 1 Header, Sequence 2 Header, *Ka*, and *Ks*. The  
269 alignment-wide ratio of non-synonymous to synonymous substitutions (*Ka/Ks*) was then calculated for  
270 all T3SE pairs that had both a *Ka* and a *Ks* value greater than 0 in each family. For codon-level analysis  
271 of positive selection in each family, we used Fast Unconstrained Bayesian Approximation (FUBAR) to  
272 detect signatures of positive selection in all families that were present in at least five strains with default  
273 settings (Murrell et al., 2013) .

274

275 For comparisons between T3SE family evolutionary rates and core genome evolutionary rates, we  
276 converted each individual core genome family alignment that was generated with MUSCLE to a  
277 nucleotide alignment with RevTrans, then concatenated these alignments end-to-end as described  
278 above. As was the case with each T3SE family, we then calculated *Ka* and *Ks* for all possible pairs of  
279 core genomes using the Nei Gojobori Method and parsed the output files into stacked data frames  
280 using our custom python script. The core genome data frame was then merged with each T3SE family  
281 data frame independently based on the genomes that the two T3SE sequences were from so that the  
282 evolutionary rates between these two T3SEs could be directly compared to the evolutionary rates of the  
283 corresponding core genomes.

284

### 285 **Gain-Loss Analysis**

286 We used Gain Loss Mapping Engine (GLOOME) to estimate the number of gain and loss events that  
287 have occurred for each T3SE family over the course of the evolution of the *P. syringae* species  
288 complex (Cohen et al., 2010). The gain-loss analysis implemented by GLOOME integrates the  
289 presence-absence data for each gene family of interest across and the phylogenetic profile to estimate  
290 the posterior expectation of gain and loss across all branches. These events are then summed to  
291 calculate the total number of gene gain and loss events that have occurred for each family across the  
292 phylogenetic tree. We performed this analysis on each T3SE family using the mixture model with  
293 variable gain/loss ratio and a gamma rate distribution. The phylogenetic tree that used for this analysis  
294 was the concatenated core genome tree, which gives us the best estimation of the evolutionary  
295 relationships between strains, given the ample recombination known to occur within the *P. syringae*  
296 species complex (Dillon et al., 2017).

297

298

## 299 **RESULTS**

300

301 In this study, we analyzed the type III effectorome of the *P. syringae* species complex using whole-  
302 genome assemblies from 494 strains representing 11 of the 13 established phylogroups and 72 distinct

303 pathovars (Supplemental Dataset S1). These strains were isolated from 28 countries between 1935  
304 and 2016, and include 62 *P. syringae* type and pathotype strains (Thakur et al., 2016). Although the  
305 majority of the strains were isolated from a diverse collection of more than 100 infected host species,  
306 we also included a number of strains isolated from environmental reservoirs, which have been  
307 dramatically under-sampled in *P. syringae* studies (Morris et al., 2007; Mohr et al., 2008; Clarke et al.,  
308 2010; Demba Diallo et al., 2012; Monteil et al., 2013; Morris et al., 2013; Monteil et al., 2016; Karasov et  
309 al., 2018). As per Dillon et al. (Dillon et al., 2017), we designate phylogroups 1, 2, 3, 4, 5, 6, and 10 as  
310 primary phylogroups and 7, 9, 11, and 13 as secondary phylogroups (we have no representatives from  
311 phylogroups 8 or 12, although presumably they would also be secondary phylogroups) (Berge et al.,  
312 2014). The primary phylogroups are phylogenetically quite distinct from the secondary phylogroups and  
313 include all of the well-studied *P. syringae* strains. Nearly all of the primary phylogroup strains carry a  
314 canonical *P. syringae* type III secretion system and were isolated from plant hosts. In contrast, many of  
315 the strains in the secondary phylogroups do not carry a canonical *P. syringae* type III secretion system  
316 and were isolated from environmental reservoirs (e.g. soil or water).

317  
318 All of the *P. syringae* genome assemblies used in this study were downloaded directly from NCBI or  
319 generated in-house by the University of Toronto Centre for the Analysis of Genome Evolution &  
320 Function using paired-end data from the Illumina GAIIx or the Illumina MiSeq platform. There was some  
321 variation in the genome sizes, contig numbers, and N50s among strains due to the fact that the majority  
322 of the genomes are *de novo* assemblies in draft format (Figure S1); however, the number of coding  
323 sequences identified in each strain were largely consistent with the six finished (closed and complete)  
324 genome assemblies in our dataset. Given the large size of the *P. syringae* pan-genome, the fact that  
325 some strains have acquired large plasmids, and the relatively high frequency of horizontal gene transfer  
326 in the *P. syringae* species complex (Baltrus et al., 2011; Dillon et al., 2017), we expect there to be some  
327 variation in genome size and coding content of different strains.

328

### 329 **Distribution of type III secreted effectors in the *P. syringae* species complex**

330 To explore the distribution of T3SEs across the *P. syringae* species complex, we first identified all  
331 putative T3SEs present in each of our 494 genome assemblies using a blastp analysis (Altschul et al.,  
332 1997), where all protein sequences from each *P. syringae* genome were queried against a database of  
333 known *P. syringae* T3SEs obtained from the *Pseudomonas syringae* Genome Resource Database  
334 (<https://pseudomonas-syringae.org>), the Bean 2.0 T3SE Database (<http://systbio.cau.edu.cn/bean>), and  
335 the NCBI Protein Database (<https://www.ncbi.nlm.nih.gov>). In sum, we identified a total of 14,613  
336 confirmed and putative T3SEs, 4,636 of which were unique at the amino acid level, and 5,127 of which  
337 were unique at the nucleotide level. Individual *P. syringae* strains in the dataset harbored between one  
338 and 53 putative T3SEs, with a mean of  $29.58 \pm 10.13$  (stddev), highlighting considerable variation in

339 both the composition and size of each strain's suite of T3SEs (Figure 1). As expected, primary  
340 phylogroup strains tended to harbor substantially more T3SEs than secondary phylogroups strains  
341 ( $30.55 \pm 8.97$  vs.  $3.89 \pm 1.64$ , respectively), which frequently do not contain a canonical T3SS (Dillon et  
342 al., 2017). However, a subset of strains from phylogroups 2 and 3, and all strains from phylogroup 10  
343 harbored fewer than 10 T3SEs, more closely mirroring secondary phylogroup strains in their T3SE  
344 content. The extensive T3SE repertoires found in most primary phylogroup strains supports the idea  
345 that these effectors play an important role in the ecological interactions of the majority of strains in this  
346 species complex.

347  
348 Objective criteria are required for partitioning and classifying T3SEs prior to any study of their  
349 distribution and evolution. In 2005, an effort was made to unify the disparate classification and naming  
350 conventions applied to *P. syringae* T3SEs (Lindeberg et al., 2005). While this effort was very successful  
351 overall, the criteria have not been universally or consistently applied, resulting in some problematic  
352 families. For example, the HopK and AvrRps4 families are homologous over the majority of their protein  
353 sequences, but are assigned to distinct families, while the HopX family contains highly divergent  
354 subfamilies that only share short tracts of local similarity.

355  
356 We reassessed the relationship between all 14,613 T3SEs using a formalized protocol in order to  
357 objectively delimit families and clarify the current classification. While the selection of the specific  
358 delimiting criteria is arbitrary and open to debate, we have elected to use a well-established protocol  
359 with fairly conservative thresholds. We identified shared similarity using a BLASTP-based pairwise  
360 reciprocal best hit approach (Altschul et al., 1997; Eisen, 2000; Daubin et al., 2002), with a stringent  
361 Expect-value acceptance threshold of  $E < 1e-24$  and a length coverage cutoff of  $\geq 60\%$  of the shorter  
362 sequence (regardless of whether it is query or subject). It should be noted that since this approach uses  
363 BLAST it requires only local similarity between family members. Nevertheless, our stringent E-value  
364 and coverage thresholds select for matches that share more extensive similarity than would typically be  
365 observed when proteins only share a single domain. We feel that these criteria provide a reasonable  
366 compromise between very relaxed local similarity criteria (using default BLAST parameters) and very  
367 conservative global similarity criteria. All T3SEs that exceeded our acceptance thresholds were sorted  
368 into family bins. T3SEs in each bin can therefore be either connected through direct similarity or  
369 transitive similarity. Finally, we assigned a name to all T3SEs in each bin based on the most common  
370 effector family name in that bin.

371  
372 Our analysis identified 70 T3SE families and sorted T3SEs into their historical families in the majority of  
373 cases. However, there were some exceptions, including merging existing effector families that shared  
374 significant local similarity (Table 1), and creating some new, putative families that were generated from

375 T3SEs originally assigned to existing families, but which did not pass our local similarity thresholds  
376 (Table 2). A number of these new families only contain a single allele, so it is likely that they are recent  
377 pseudogenes still annotated as coding sequences by Prodigal. Finally, in two cases, a subset of alleles  
378 from one T3SE family were assigned to a different family due to the extent of shared local similarity.  
379 This included the assignment of all originally designated HopS1 subfamily alleles to HopO, and the  
380 assignment of all originally designated HopX3 alleles to HopF.

381  
382 It is important to emphasize that the new criteria do not bin T3SEs that share less than 60% similarity  
383 across the shortest sequence. This was done to prevent families from being combined due to short  
384 chimeric relationships between a subset of the alleles in distinct families (Stavrinos et al., 2006).  
385 These relationships could be recognized as super-families, although the reticulated nature of these  
386 relationships makes this unwieldy. We list families that share these short regions of similarity in Figure  
387 2, although it is important to recognize that some of these chimeric relationships are only displayed by a  
388 subset of alleles in each family. While we acknowledge that some of the new T3SE family boundaries  
389 may cause concern due to conflicts with historical naming, we feel it is essential to use unambiguous  
390 and consistent criteria for family delimitation.

391  
392 The distribution of each of these 70 T3SE families across the *P. syringae* species complex reveals that  
393 the majority of families are present in only a small subset of *P. syringae* strains, typically from a few  
394 primary phylogroups (Figure 3; Figure S2). Among T3SE effector families, only AvrE, HopB, HopM, and  
395 HopAA are considered part of the soft-core genome of *P. syringae* (present in > 95% of strains).  
396 Interestingly, three of these core families, AvrE, HopM, and HopAA are part of the conserved effector  
397 locus (CEL), a well characterized and evolutionarily conserved sequence region that is present in most  
398 *P. syringae* strains (Alfano et al., 2000; Dillon et al., 2017). However, the fourth effector from the CEL,  
399 HopN, is only present in 14.98% of strains, all of which are from phylogroup 1. While the remainder of  
400 T3SE families are also mostly present in a small subset of strains, there is a wide distribution in the  
401 number of strains harboring individual T3SE families, further highlighting the dramatic variation in T3SE  
402 content across *P. syringae* strains (Figure S3).

403  
404 Following family and strain T3SE classification, we also performed hierarchical clustering using the  
405 T3SE content of each strain to determine if T3SE profiles are a good predictor of host specificity. We  
406 previously reported that in *P. syringae*, neither the core genome or gene content phylogenetic trees  
407 correlate well with the hosts from which the strains were isolated (Dillon et al., 2017). This remains true  
408 in this study, where we've updated the core and pan-genome analyses with an expanded set of strains  
409 (Figure S4; Figure S5). The T3SE content tree is not as well resolved due to the smaller number of  
410 phylogenetically informative signals in the T3SE dataset. However, we were able to largely recapitulate

411 the established *P. syringae* phylogroups with this analysis, suggesting that more closely related strains  
412 do tend to have more similar T3SE repertoires (Figure S6). We also see that the phylogroup 2,  
413 phylogroup 3, and phylogroup 10 strains that have smaller T3SE repertoires than other primary  
414 phylogroups, cluster more closely with secondary phylogroup strains in the effectorome tree. However,  
415 as was the case in the core genome and gene content trees, hierarchical clustering based on effector  
416 content did not effectively separate strains based on their host of isolation. We therefore conclude that  
417 overall T3SE content is not a good predictor of host specificity.

418

### 419 **Diversification of type III secreted effectors in the *P. syringae* species complex**

420 Substantial genetic and functional diversity has been shown to exist within individual T3SE families  
421 (Lewis et al., 2014; Dillon et al., 2017). While some T3SE families are relatively small, restricted to only  
422 a subset of *P. syringae* strains, and present in only a single copy in each strain, others are found in  
423 nearly all strains, and often appear in multiple copies within a single genome (Figure 4). Many of the  
424 largest families, including those that are part of the core genome (AvrE, HopB, HopM, and HopAA), are  
425 among those that are often present in multiple copies. However, we also found that some families that  
426 are present in less than half of *P. syringae* strains (e.g. HopF, HopO, HopZ, and HopBL) frequently  
427 appear in multiple copies. The average copy number of individual T3SEs per strain across all families is  
428 1.30, while some families are present in copy numbers as high as six.

429

430 To quantify the extent of genetic diversification within each T3SE family, we aligned the amino acid  
431 sequences of all members from each family with MUSCLE, then reverse translated these amino acid  
432 alignments and calculated all pairwise non-synonymous ( $K_a$ ) and synonymous ( $K_s$ ) substitution rates  
433 for all pairs of alleles within each family. There was a broad range of pairwise substitution rates in the  
434 majority of T3SE families, which is expected given the range of divergence times in the core-genomes  
435 of strains from different *P. syringae* phylogroups (Dillon et al., 2017). The three families with the highest  
436 non-synonymous substitution rates were HopF, HopAB, and HopAT (Figure 5A), which all have an  
437 average  $K_a$  greater than 0.5. These families also tended to have relatively high synonymous  
438 substitution rates, but several other families also have  $K_s$  values that are greater than 1.0 (Figure 5B).

439

440 While some pairwise comparisons of effector alleles did yield a  $K_a/K_s$  ratio greater than 1, the  
441 predominance of purifying selection operating in the conserved domains of these families likely  
442 overwhelms signals of positive selection at individual sites. Indeed, the average global pairwise  $K_a/K_s$   
443 values were less than 1 for all T3SE families (Figure 5C). Therefore, we also analyzed the  $K_a$  and  $K_s$   
444 on a per codon basis using FUBAR to search for site-specific signals of positive selection in each family  
445 (Bayes Empirical Bayes P-Value  $\geq 0.9$ ;  $K_a/K_s > 1$ ) (Murrell et al., 2013). We find that 37 out of the 64  
446 (57.81%) T3SE families with at least five alleles have at least one positively selected site. The number



447 of positively selected sites in these families was relatively low, ranging from 1 to 17, with the  
448 percentage of positively selected sites in a single family never rising above 2.29% (Table 3). By  
449 comparison, we found that only 3,888/17,807 (21.83%) ortholog families from the pangenome of *P.*  
450 *syringae* that were present in at least five strains demonstrated signatures of positive selection at one  
451 or more sites (Dillon et al., 2017), suggesting that T3SE families experience extremely high rates of  
452 positive selection.

453

454

455 Finally, to explore whether T3SE families display different levels of diversity than core gene families  
456 carried by the same *P. syringae* strains, we compared all pairwise  $K_a$  and  $K_s$  values within each  
457 effector family to the pairwise  $K_a$  and  $K_s$  values for the core genes carried in the corresponding  
458 genomes. We would expect T3SEs and core genes to share the same  $K_a$  and  $K_s$  values if they were  
459 evolving under the same evolutionary pressures. Deviation from this null expectation could be due to  
460 either differences in selective pressures, or the movement of the T3SE via horizontal gene transfer  
461 (HGT). We find that the pairwise  $K_a$  values for T3SEs are substantially higher than those of the  
462 corresponding core genes for the majority of T3SEs (Figure 5A; Figure S7). This was also true for  
463 pairwise  $K_s$  values, although the differences between T3SE pairs and core genes were not as high and  
464 there were many more examples of T3SE pairs that had lower  $K_s$  values than the corresponding core  
465 genes (Figure 6B; Figure S8).

466

#### 467 **Gene gain and loss of type III secreted effectors in the *P. syringae* species complex.**

468 Both the patchy distribution of T3SE families across the *P. syringae* species complex and the  
469 inconsistent relationships between T3SE and core gene substitution rates suggest that HGT may be an  
470 important evolutionary force contributing to the evolution of T3SEs in the *P. syringae* species complex.  
471 Therefore, we also sought to analyze the expected number of gene gain events across the *P. syringae*  
472 phylogenetic tree in order to more accurately quantify the extent to which HGT has actively transferred  
473 T3SEs between *P. syringae* strains over the evolutionary history of the species complex. We used the  
474 Gain Loss Mapping Engine (GLOOME) to estimate the number of gain and loss events (Cohen et al.,  
475 2010; Cohen and Pupko, 2010), and found extensive evidence for HGT in several T3SE families, with  
476 some families experiencing as many as 40 HGT events over the course of the history of the *P. syringae*  
477 species complex (Figure 7). Outlier T3SE families that did not appear to have undergone much HGT in  
478 *P. syringae* include the smallest families, like HopU, HopBE, and HopBR, and the largest families, like  
479 AvrE, HopB, HopM, and HopAA. Smaller families were less likely to have undergone HGT because  
480 they were only identified in a subset of closely related strains, so are not expected to have been part of  
481 the *P. syringae* species complex through the majority of its evolutionary history. Larger families may  
482 experience less HGT because they are more likely to already be present in the recipient strain and



483 therefore will quickly be lost following an HGT event. However, because GLOOME only identifies HGT  
484 events that result in the gain of a new family, we cannot be certain whether *P. syringae* genomes with  
485 multiple copies were generated by HGT or gene duplication.

486  
487 An opposing evolutionary force that is also expected to have a disproportional effect on the evolution of  
488 T3SE families is gene loss. Specifically, loss of a given T3SE may allow a *P. syringae* strain to infect a  
489 new host by shedding an effector that elicits the hosts' ETI response. Indeed, we found that gene loss  
490 events were also common in many T3SE families, with more than 50 events estimated to have  
491 occurred in the HopAT and HopAZ families (Figure 7). T3SE families that experienced more gene loss  
492 events also tended to experience more gene gain events, as demonstrated by a strong positive  
493 correlation between gene loss and gene gain in T3SE families (Figure S9) (linear regression;  $F =$   
494  $140.50$ ,  $df = 1, 68$ ,  $p < 0.0001$ ,  $r^2 = 0.67$ ). However, as was the case with gene gain events, we  
495 observed few gene losses in the smallest and the largest T3SE families. For small families, this is again  
496 likely to be the result of the fact that they have spent less evolutionary time in the *P. syringae* species  
497 complex. For large families, we are again blind to gene loss events that occur in a genome that has  
498 multiple copies of the effector prior to the loss event. Therefore, there are likely many more T3SE  
499 losses occurring in larger families than we observe here because these T3SE families tend to be  
500 present in multiple copies within the same genome.

501  
502 Finally, we also observed that there is a significant positive correlation between both evolutionary rate  
503 parameters and the rates of gene gain and loss for T3SE families (*Ka*-Gene Gain:  $F = 8.48$ ,  $df = 1, 63$ ,  
504  $p = 0.0050$ ,  $r^2 = 0.1186$ ; *Ka*-Gene Loss:  $F = 16.15$ ,  $df = 1, 63$ ,  $p = 0.0002$ ,  $r^2 = 0.2041$ ; *Ks*-Gene Gain:  $F =$   
505  $6.46$ ,  $df = 1, 63$ ,  $p = 0.0135$ ,  $r^2 = 0.0930$ ; *Ks*-Gene Loss:  $F = 7.70$ ,  $df = 1, 63$ ,  $p = 0.0072$ ,  $r^2 = 0.1089$ )  
506 (Figure S10). This implies that the same evolutionary forces resulting in diversification of T3SEs are  
507 also causing them to undergo elevated rates of gain or loss. However, there was substantial  
508 unexplained variance in these correlations, resulting in some T3SE families that have high evolutionary  
509 rates and low levels of gain and loss, and other T3SE families that have low evolutionary rates and high  
510 levels of gain and loss. These families tended to be the same for all correlations.

511

512

## 513 **DISCUSSION**

514

515 Bacterial T3SEs are primary virulence factors in a wide-range of plant and animal pathogens (Hueck,  
516 1998;Desveaux et al., 2006;Zhou and Chai, 2008;Block and Alfano, 2011;Buttner, 2016;Khan et al.,  
517 2016;Hu et al., 2017;Khan et al., 2018;Xin et al., 2018). T3SEs are particularly interesting from an  
518 evolutionary perspective due to their dual and diametrically opposed roles in host-pathogen

519 interactions. While T3SEs have evolved in order to promote bacterial fitness, usually via the  
520 suppression of host immunity or disruption of host cellular homeostasis, hosts have evolved  
521 mechanisms to recognize the presence or activity of T3SEs, and this recognition often elicits an  
522 immune response that shifts the interaction back into the host's favor. To explore the distribution and  
523 evolutionary history of *P. syringae* T3SEs and gain insight into their role in host specificity, we  
524 catalogued the T3SE repertoires of a large and diverse collection of 494 *P. syringae* isolates. These  
525 phylogenetically diverse strains allowed us to generate an expanded database of more than 14,000  
526 T3SE alleles and investigate the evolutionary mechanisms through which these important molecules  
527 have enabled *P. syringae* to become one of the most globally important bacterial plant pathogens  
528 (Mansfield et al., 2012).

### 529 530 **Expanded database of type III secreted effectors in *P. syringae***

531 This study increases the number of confirmed and putative T3SE alleles available in the *P. syringae*  
532 Genome Resources Database by 20-fold, resulting in a final database of 14,613 T3SE alleles from the  
533 *P. syringae* species complex, 5,127 of which are unique at the nucleotide level. Although these new,  
534 putative T3SEs all share an ancestral sequence with known T3SE families, the extensive diversification  
535 that has occurred within many of these families clearly indicates that some level of functional  
536 diversification has occurred.

537  
538 Consistent with our earlier analysis, we find that primary phylogroup strains harbor considerably larger  
539 repertoires of T3SEs than secondary phylogroup strains (Baltrus et al., 2011; O'Brien et al.,  
540 2011; Dudnik and Dudler, 2014; Dillon et al., 2017). We also find that a small number of primary  
541 phylogroup strains have significantly smaller effector repertoires; including phylogroup 10 strains, which  
542 were primarily isolated from non-agricultural sources similar to most secondary phylogroup strains, and  
543 the phylogroup 2 strain Psy642, which has previously been highlighted as an outlier in its T3SE content  
544 and has been characterized as non-pathogenic (Clarke et al., 2010; O'Brien et al., 2011). In general,  
545 phylogroup 2 strains have somewhat smaller T3SE repertoires and employ a greater number of  
546 phytotoxins relative to other primary phylogroup strains (Baltrus et al., 2011; O'Brien et al., 2011; Dillon  
547 et al., 2017). This may indicate that phylogroup 2 strains have evolved a different host-microbe lifestyle  
548 than other *P. syringae* primary phylogroup strains, e.g. one tending towards low virulence, epiphytic  
549 interactions, rather than high virulence, invasive pathogenesis (Hirano and Upper, 2000).

550  
551 Among the 70 T3SE families that were delimited in this study, seven of them had fewer than five total  
552 members (HopBR, HopBS, HopBT, HopBU, HopBV, HopBW, HopBX). These families all consist of  
553 alleles that were separated from a larger T3SE family during the delimitation stage of our analysis  
554 because they shared only very limited regions of local similarity with the larger family. The small size of

555 these families suggests that they may be pseudogenes degenerating due to a lack of selective  
556 constraints. The 63 remaining families are similar to the ~60 families that have been discussed in  
557 earlier studies (Baltrus et al., 2011;Lindeberg et al., 2012). While we do merge seven families based on  
558 our delimitation analysis, seven new families have been discovered in the past five years (McCann et  
559 al., 2013;Hockett et al., 2014;Lam et al., 2014;Matas et al., 2014;Mucyn et al., 2014). Unfortunately, our  
560 objective delimitation analysis separated HopX2 from HopX, HopZ3 from HopZ, and HopH3 from  
561 HopH, forming the HopBO, HopBP, and HopBQ families, respectively. Despite these differences, we  
562 arrive at several similar conclusions to prior work on the distribution of individual T3SEs across *P.*  
563 *syringae* strains. Specifically, we find that few T3SE families are considered part of the core genome  
564 (Baltrus et al., 2011;O'Brien et al., 2011;Lindeberg et al., 2012), with only AvrE, HopB, HopM, and  
565 HopAA being present in more than 95% of strains. Three of these families (AvrE, HopM, and HopAA)  
566 are part of the CEL, while the other CEL effector, HopN, is only present in 14.98% of *P. syringae*  
567 strains, all from phylogroup 2. This suggests that HopN arose in the CEL after the divergence of this  
568 phylogroup. Other families that have previously been characterized as core T3SEs in *P. syringae*  
569 include HopI and HopAH (Baltrus et al., 2011), which are only present in 79.76% and 89.07% of strains  
570 from our study, respectively. HopB has not been highlighted as a core T3SE in prior studies, likely  
571 because it had been split into the HopB and HopAC families. We find that alleles from these families  
572 are quite similar, often sharing reciprocal BLASTP hits across more than 80% of the HopB sequence  
573 with E-values less than 1e-24, which indicates that HopB and HopAC should be considered a single  
574 family. The remainder of T3SE families have a considerably sparser distribution across the *P. syringae*  
575 species complex, ranging in frequency from 1.62% to 80.97%. This demonstrates that different T3SE  
576 families were likely acquired episodically throughout the evolutionary history of the *P. syringae* species  
577 complex and are subject to strong evolutionary pressures for gain and loss due to the widespread and  
578 diverse ETI surveillance system of plants (Cunnac et al., 2009;Xin et al., 2018).

579  
580 Finally, we find that highly divergent combinations of T3SEs can enable *P. syringae* to infect the same  
581 host (Figure S6). While this observation is consistent with prior studies in *P. syringae* (Baltrus et al.,  
582 2011;Lindeberg et al., 2012;O'Brien et al., 2012), it is in contrast to the convergence in T3SE  
583 repertoires that has been observed in *Xanthomonas*, another phytopathogen that employs a T3SS  
584 (Hajri et al., 2009). Importantly, this limits our ability to detect and differentiate *P. syringae* pathogens of  
585 different hosts using this fairly crude application of comparative genomics. The lack of correlation  
586 between T3SE repertoires and host specificity may be a direct result of the fact that there is substantial  
587 functional redundancy among *P. syringae* T3SEs from different families, or that certain T3SEs in  
588 combination can mask the detection of other T3SEs in a given *P. syringae* background (Cunnac et al.,  
589 2009;Cunnac et al., 2011;Lindeberg et al., 2012;Wei et al., 2018). However, it will be important moving

590 forward to assess the true host range of a broader collection of *P. syringae* strains in order to determine  
591 whether specific T3SEs promote or suppress growth on particular hosts.

592

### 593 **Genetic and functional evolution of *P. syringae* type III secreted effectors**

594 Given the broad array of unique T3SEs that exist within the *P. syringae* species complex, mining this  
595 untapped diversity is likely to reveal a number of new functions and interactions for T3SEs in *P.*  
596 *syringae*. By quantifying  $K_a$ ,  $K_s$ , and  $K_a/K_s$  for each pair of T3SE alleles in each family, we identified  
597 substantial genetic diversity in several T3SE families (Figure 5). Our codon-level analysis of positive  
598 selection also revealed that T3SE families were substantially more likely than non-T3SE families to  
599 contain positively selected sites (Table 3). Finally, we confirmed that this divergence is not simply a  
600 reflection of the immense diversity exhibited by the strains used in this study, since the divergence  
601 observed for T3SE families is consistently higher than the divergence observed across core genes  
602 (Figure S7; Figure S8). Elevated non-synonymous substitution rates in T3SE families implies that there  
603 is elevated positive selection operating on these families. Elevated synonymous substitution rates  
604 additionally show that this elevated positive selection may extend to synonymous sites, that many  
605 T3SEs arose prior to the last common ancestor (LCA) of the *P. syringae* species complex, and/or that  
606 T3SEs undergo considerably higher rates of HGT than core genes.

607

608 Fast-evolving T3SEs will also provide numerous opportunities for studying Red Queen dynamics (van  
609 Valen, 1973). Under Fluctuating Red Queen (FRQ) dynamics, fluctuating selection drives oscillations in  
610 allele frequencies at the focal genetic loci in both the pathogen and the host, resulting in rapid  
611 evolutionary change on both sides (Brockhurst et al., 2014). In the case of *P. syringae* and their plant  
612 hosts, bacterial T3SEs are the key players on the pathogen side, and plant resistance genes are the  
613 key players on the host side. These FQR dynamics are expected to maintain high levels of within-  
614 population genetic diversity at focal loci, as we've observed in many T3SE families. The majority of  
615 T3SE families in *P. syringae* are highly divergent and display strong signatures of positive selection,  
616 likely in response to intense host-imposed selection to evade recognition (Rohmer et al., 2004; Baltrus  
617 et al., 2011; Lindeberg et al., 2012). This implies that few T3SEs are broadly unrecognized, making  
618 interactions between individual T3SEs and the corresponding plant resistance genes an excellent  
619 resource for exploring FQR dynamics.

620

621 The highly dynamic nature of T3SE evolution is also seen in our analysis of T3SE gain and loss across  
622 the *P. syringae* phylogenetic tree. More than five gene gain events are estimated to have occurred in  
623 52 out of the 70 T3SE families analyzed in this study, with a maximum of 41 HGT events estimated in  
624 the HopZ family. Gene loss events were even more common, with 57 out of 70 T3SE families  
625 experiencing more than five loss events and a maximum of 53 events in the HopAZ family. Earlier

626 studies have also suggested that both gene gain and loss were quite common among T3SE families.  
627 One specific study using nucleotide composition and phylogenetics found that members from 11 out of  
628 24 tested *P. syringae* T3SE families were recently acquired by HGT (Rohmer et al., 2004). These  
629 families included AvrA, AvrB, AvrD, AvrRpm, HopG, HopQ, HopX, HopZ, HopAB, HopAF, and HopAM  
630 (although AvrD is not a T3SE (Leach and White, 1996;Mucyn et al., 2014)). The T3SEs from this  
631 dataset were also highlighted by this study as undergoing considerably high rates of gene gain and loss  
632 within the *P. syringae* species complex. Specifically, all of these T3SEs were demonstrated to have  
633 undergone at least ten gene gain events and many were among the most dynamic T3SEs in our  
634 dataset. Other studies have shown that many T3SEs are present on mobile genetic elements and that  
635 T3SEs from the same family are often found at different genomic locations (Kim and Alfano,  
636 2002;Charity et al., 2003;Lovell et al., 2009;Godfrey et al., 2011;Lovell et al., 2011;Neale et al., 2016),  
637 which may both promote and be a consequence of the high rates of gene gain and loss for particular  
638 T3SE families. From a selective perspective, it is also likely that host immune recognition can drive  
639 selection for gene gain or loss (Vinatzer et al., 2006), while the functional redundancy of different T3SE  
640 families carried in the same genetic background may limit the negative impacts of the loss of such  
641 T3SEs (Kvitko et al., 2009;Cunnac et al., 2011;Wei et al., 2018). Finally, as has been previously  
642 reported (Baltrus et al., 2011), we find that there is a significant positive correlation between rates of  
643 evolution and rates of gene gain and loss (Figure S10), suggesting that similar evolutionary forces that  
644 cause the diversification of T3SEs are contributing to the loss and gain of T3SEs. However, not all  
645 T3SEs fit this model which could reflect that T3SEs vary in their mutational robustness and/or that the  
646 genomic context of different T3SEs makes them more or less prone to HGT. In any event, the  
647 extensive gene gain and loss that occurs in the majority of T3SE families lends further support to the  
648 hypothesis that few T3SE alleles are broadly unrecognized (Baltrus et al., 2011).

649  
650 Given the highly dynamic nature of T3SE evolution, we predict that there are still numerous T3SEs that  
651 will be found to elicit ETI. Most research on ETI elicitation to date has focused on a small number of  
652 T3SE families, and an even smaller number of alleles from each family (Mansfield, 2009). The  
653 immense diversification that we observe in many T3SE families points to strong selective pressures  
654 that may be explained by as-yet discovered ETI responses. If this prediction holds true, it will be  
655 particularly interesting to study T3SE families with alleles that induce different ETI responses in the  
656 same host. These patterns will help reveal how strains shift onto new hosts or break immunity in an  
657 existing host, perhaps explaining the evolutionary driving force behind new disease outbreaks.

658  
659  
660  
661

## DATA ACCESS

662 All genomic data produced by this study have been submitted to NCBI. Accession numbers for all  
663 genomes sequenced in this study and all publicly available genomes are available in Supplemental  
664 Dataset S1.

665

666

#### 667 **ACKNOWLEDGMENTS**

668 We thank all members of the Guttman and Desveaux labs for helpful discussion and valuable input on  
669 this project. This work was supported by Natural Sciences and Engineering Research Council of  
670 Canada Discovery Grants (D.S.G and D.D.), Canada Research Chairs in Comparative Genomics  
671 (D.S.G.) and Plant-Microbe Systems Biology (D.D.), and the Center for the Analysis of Genome  
672 Evolution and Function (D.S.G. and D.D.).

673

674

#### 675 **DISCLOSURE DECLARATION**

676 The authors declare no conflicts of interests or disclosures.

677

678

#### 679 **AUTHOR CONTRIBUTIONS**

680 M.M.D., D.D., and D.S.G. designed the research; M.M.D., R.A., B.L., and A.M. analyzed the data; and  
681 M.M.D, and D.S.G. wrote the paper.



682 **REFERENCES**

683

684 Alfano, J.R., Charkowski, A.O., Deng, W.L., Badel, J.L., Petnicki-Ocwieja, T., Van Dijk, K., and Collmer,  
685 A. (2000). The *Pseudomonas syringae* Hrp pathogenicity island has a tripartite mosaic structure  
686 composed of a cluster of type III secretion genes bounded by exchangeable effector and  
687 conserved effector loci that contribute to parasitic fitness and pathogenicity in plants. *Proc Natl*  
688 *Acad Sci U S A* 97, 4856-4861.

689 Almeida, N.F., Yan, S., Lindeberg, M., Studholme, D.J., Schneider, D.J., Condon, B., Liu, H., Viana,  
690 C.J., Warren, A., Evans, C., Kemen, E., Maclean, D., Angot, A., Martin, G.B., Jones, J.D.,  
691 Collmer, A., Setubal, J.C., and Vinatzer, B.A. (2009). A draft genome sequence of  
692 *Pseudomonas syringae* pv. tomato T1 reveals a type III effector repertoire significantly divergent  
693 from that of *Pseudomonas syringae* pv. tomato DC3000. *Mol Plant Microbe Interact* 22, 52-62.

694 Altschul, S.F., Madden, T.L., Schaffer, A.A., Zhang, J., Zhang, Z., Miller, W., and Lipman, D.J. (1997).  
695 Gapped BLAST and PSI-BLAST: a new generation of protein database search programs.  
696 *Nucleic Acids Res* 25, 3389-3402.

697 Andrews, S.C. (2010). "FastQC: a quality control tool for high throughput sequence data".).

698 Baltrus, D.A., Mccann, H.C., and Guttman, D.S. (2017). Evolution, genomics and epidemiology of  
699 *Pseudomonas syringae*: Challenges in Bacterial Molecular Plant Pathology. *Mol Plant Pathol*  
700 18, 152-168.

701 Baltrus, D.A., Nishimura, M.T., Dougherty, K.M., Biswas, S., Mukhtar, M.S., Vicente, J., Holub, E.B.,  
702 and Dangl, J.L. (2012). The molecular basis of host specialization in bean pathovars of  
703 *Pseudomonas syringae*. *Mol Plant Microbe Interact* 25, 877-888.

704 Baltrus, D.A., Nishimura, M.T., Romanchuk, A., Chang, J.H., Mukhtar, M.S., Cherkis, K., Roach, J.,  
705 Grant, S.R., Jones, C.D., and Dangl, J.L. (2011). Dynamic evolution of pathogenicity revealed  
706 by sequencing and comparative genomics of 19 *Pseudomonas syringae* isolates. *PLoS Pathog*  
707 7, e1002132.

708 Berge, O., Monteil, C.L., Bartoli, C., Chandeysson, C., Guilbaud, C., Sands, D.C., and Morris, C.E.  
709 (2014). A user's guide to a data base of the diversity of *Pseudomonas syringae* and its  
710 application to classifying strains in this phylogenetic complex. *PLoS One* 9, e105547.

711 Block, A., and Alfano, J.R. (2011). Plant targets for *Pseudomonas syringae* type III effectors: virulence  
712 targets or guarded decoys? *Curr Opin Microbiol* 14, 39-46.

713 Bolger, A.M., Lohse, M., and Usadel, B. (2014). Trimmomatic: a flexible trimmer for Illumina sequence  
714 data. *Bioinformatics* 30, 2114-2120.

715 Brockhurst, M.A., Chapman, T., King, K.C., Mank, J.E., Paterson, S., and Hurst, G.D. (2014). Running  
716 with the Red Queen: the role of biotic conflicts in evolution. *Proc Biol Sci* 281.

- 717 Buttner, D. (2016). Behind the lines-actions of bacterial type III effector proteins in plant cells. *FEMS*  
718 *Microbiol Rev* 40, 894-937.
- 719 Charity, J.C., Pak, K., Delwiche, C.F., and Hutcheson, S.W. (2003). Novel exchangeable effector loci  
720 associated with the *Pseudomonas syringae* hrp pathogenicity island: evidence for integron-like  
721 assembly from transposed gene cassettes. *Mol Plant Microbe Interact* 16, 495-507.
- 722 Clarke, C.R., Cai, R., Studholme, D.J., Guttman, D.S., and Vinatzer, B.A. (2010). *Pseudomonas*  
723 *syringae* strains naturally lacking the classical *P. syringae* hrp/hrc locus are common leaf  
724 colonizers equipped with an atypical type III secretion system. *Mol Plant Microbe Interact* 23,  
725 198-210.
- 726 Coburn, B., Sekirov, I., and Finlay, B.B. (2007). Type III secretion systems and disease. *Clin Microbiol*  
727 *Rev* 20, 535-549.
- 728 Cohen, O., Ashkenazy, H., Belinky, F., Huchon, D., and Pupko, T. (2010). GLOOME: gain loss  
729 mapping engine. *Bioinformatics* 26, 2914-2915.
- 730 Cohen, O., and Pupko, T. (2010). Inference and characterization of horizontally transferred gene  
731 families using stochastic mapping. *Mol Biol Evol* 27, 703-713.
- 732 Coordinators, N.R. (2018). Database resources of the National Center for Biotechnology Information.  
733 *Nucleic Acids Res* 46, D8-d13.
- 734 Cunnac, S., Chakravarthy, S., Kvitko, B.H., Russell, A.B., Martin, G.B., and Collmer, A. (2011). Genetic  
735 disassembly and combinatorial reassembly identify a minimal functional repertoire of type III  
736 effectors in *Pseudomonas syringae*. *Proc Natl Acad Sci U S A* 108, 2975-2980.
- 737 Cunnac, S., Lindeberg, M., and Collmer, A. (2009). *Pseudomonas syringae* type III secretion system  
738 effectors: repertoires in search of functions. *Curr Opin Microbiol* 12, 53-60.
- 739 Daubin, V., Gouy, M., and Perriere, G. (2002). A phylogenomic approach to bacterial phylogeny:  
740 evidence of a core of genes sharing a common history. *Genome Res* 12, 1080-1090.
- 741 Demba Diallo, M., Monteil, C.L., Vinatzer, B.A., Clarke, C.R., Glaux, C., Guilbaud, C., Desbiez, C., and  
742 Morris, C.E. (2012). *Pseudomonas syringae* naturally lacking the canonical type III secretion  
743 system are ubiquitous in nonagricultural habitats, are phylogenetically diverse and can be  
744 pathogenic. *ISME J* 6, 1325-1335.
- 745 Deng, W., Marshall, N.C., Rowland, J.L., McCoy, J.M., Worrall, L.J., Santos, A.S., Strynadka, N.C.J.,  
746 and Finlay, B.B. (2017). Assembly, structure, function and regulation of type III secretion  
747 systems. *Nat Rev Microbiol* 15, 323-337.
- 748 Desveaux, D., Singer, A.U., and Dangl, J.L. (2006). Type III effector proteins: doppelgangers of  
749 bacterial virulence. *Curr Opin Plant Biol* 9, 376-382.
- 750 Dillon, M.M., Thakur, S., Almeida, R.N.D., and Guttman, D.S. (2017). Recombination of ecologically  
751 and evolutionarily significant loci maintains genetic cohesion in the *Pseudomonas syringae*  
752 species complex. *bioRxiv*.

- 753 Dodds, P.N., and Rathjen, J.P. (2010). Plant immunity: towards an integrated view of plant-pathogen  
754 interactions. *Nat Rev Genet* 11, 539-548.
- 755 Dong, X., Lu, X., and Zhang, Z. (2015). BEAN 2.0: an integrated web resource for the identification and  
756 functional analysis of type III secreted effectors. *Database (Oxford)* 2015, bav064.
- 757 Dudnik, A., and Dudler, R. (2014). Virulence determinants of *Pseudomonas syringae* strains isolated  
758 from grasses in the context of a small type III effector repertoire. *BMC Microbiol* 14, 304.
- 759 Edgar, R.C. (2004). MUSCLE: a multiple sequence alignment method with reduced time and space  
760 complexity. *BMC Bioinformatics* 5, 1-19.
- 761 Eisen, J.A. (2000). Assessing evolutionary relationships among microbes from whole-genome analysis.  
762 *Curr Opin Microbiol* 3, 475-480.
- 763 Fillingham, A.J., Wood, J., J.R., B., Crute, I.R., Mansfield, J.W., Taylor, J.D., and Vivian, A. (1992).  
764 Avirulence genes from *Pseudomonas syringae* pathovars *phaseolicola* and *pisi* confer  
765 specificity towards both host and non-host species. *Physiological and Molecular Plant Pathology*  
766 40, 1-15.
- 767 Godfrey, S.A., Lovell, H.C., Mansfield, J.W., Corry, D.S., Jackson, R.W., and Arnold, D.L. (2011). The  
768 stealth episome: suppression of gene expression on the excised genomic island PPHGI-1 from  
769 *Pseudomonas syringae* pv. *phaseolicola*. *PLoS Pathog* 7, e1002010.
- 770 Hajri, A., Brin, C., Hunault, G., Lardeux, F., Lemaire, C., Manceau, C., Boureau, T., and Poussier, S.  
771 (2009). A "repertoire for repertoire" hypothesis: repertoires of type three effectors are candidate  
772 determinants of host specificity in Xanthomonas. *PLoS One* 4, e6632.
- 773 Hirano, S.S., and Upper, C.D. (2000). Bacteria in the leaf ecosystem with emphasis on *Pseudomonas*  
774 *syringae*-a pathogen, ice nucleus, and epiphyte. *Microbiol Mol Biol Rev* 64, 624-653.
- 775 Hockett, K.L., Nishimura, M.T., Karlsrud, E., Dougherty, K., and Baltrus, D.A. (2014). *Pseudomonas*  
776 *syringae* CC1557: a highly virulent strain with an unusually small type III effector repertoire that  
777 includes a novel effector. *Mol Plant Microbe Interact* 27, 923-932.
- 778 Hu, Y., Huang, H., Cheng, X., Shu, X., White, A.P., Stavrinides, J., Koster, W., Zhu, G., Zhao, Z., and  
779 Wang, Y. (2017). A global survey of bacterial type III secretion systems and their effectors.  
780 *Environ Microbiol* 19, 3879-3895.
- 781 Hueck, C.J. (1998). Type III protein secretion systems in bacterial pathogens of animals and plants.  
782 *Microbiol Mol Biol Rev* 62, 379-433.
- 783 Hyatt, D., Chen, G.L., Locascio, P.F., Land, M.L., Larimer, F.W., and Hauser, L.J. (2010). Prodigal:  
784 prokaryotic gene recognition and translation initiation site identification. *BMC Bioinformatics* 11,  
785 119.
- 786 Jenner, C., Hitchin, E., Mansfield, J., Walters, K., Betteridge, P., Teverson, D., and Taylor, J. (1991).  
787 Gene-for-gene interactions between *Pseudomonas syringae* pv. *phaseolicola* and Phaseolus.  
788 *Mol Plant Microbe Interact* 4, 553-562.

- 789 Jones, J.D., and Dangl, J.L. (2006). The plant immune system. *Nature* 444, 323-329.
- 790 Karasov, T.L., Almaro, J., Friedemann, C., Ding, W., Giolai, M., Heavens, D., Kersten, S., Lundberg,  
791 D.S., Neumann, M., Regalado, J., Neher, R.A., Kemen, E., and Weigel, D. (2018). *Arabidopsis*  
792 *thaliana* and *Pseudomonas* pathogens exhibit stable associations over evolutionary timescales.  
793 *Cell Host Microbe* 24, 168-179.e164.
- 794 Keen, N.T. (1990). Gene-for-gene complementarity in plant-pathogen interactions. *Annu Rev Genet* 24,  
795 447-463.
- 796 Keen, N.T., and Staskawicz, B. (1988). Host Range Determinants in Plant-Pathogens and Symbionts.  
797 *Annu Rev Microbiol* 42, 421-440.
- 798 Khan, M., Seto, D., Subramaniam, R., and Desveaux, D. (2018). Oh, the places they'll go! A survey of  
799 phytopathogen effectors and their host targets. *Plant J* 93, 651-663.
- 800 Khan, M., Subramaniam, R., and Desveaux, D. (2016). Of guards, decoys, baits and traps: pathogen  
801 perception in plants by type III effector sensors. *Curr Opin Microbiol* 29, 49-55.
- 802 Kim, J.F., and Alfano, J.R. (2002). Pathogenicity islands and virulence plasmids of bacterial plant  
803 pathogens. *Curr Top Microbiol Immunol* 264, 127-147.
- 804 Kobayashi, D.Y., Tamaki, S.J., and Keen, N.T. (1989). Cloned avirulence genes from the tomato  
805 pathogen *Pseudomonas syringae* pv. tomato confer cultivar specificity on soybean. *Proc Natl*  
806 *Acad Sci U S A* 86, 157-161.
- 807 Kumar, S., Stecher, G., and Tamura, K. (2016). MEGA7: Molecular Evolutionary Genetics Analysis  
808 Version 7.0 for Bigger Datasets. *Mol Biol Evol* 33, 1870-1874.
- 809 Kvitko, B.H., Park, D.H., Velasquez, A.C., Wei, C.F., Russell, A.B., Martin, G.B., Schneider, D.J., and  
810 Collmer, A. (2009). Deletions in the repertoire of *Pseudomonas syringae* pv. tomato DC3000  
811 type III secretion effector genes reveal functional overlap among effectors. *PLoS Pathog* 5,  
812 e1000388.
- 813 Lam, H.N., Chakravarthy, S., Wei, H.L., Bui Nguyen, H., Stodghill, P.V., Collmer, A., Swingle, B.M., and  
814 Cartinhour, S.W. (2014). Global analysis of the HrpL regulon in the plant pathogen  
815 *Pseudomonas syringae* pv. tomato DC3000 reveals new regulon members with diverse  
816 functions. *PLoS One* 9, e106115.
- 817 Leach, J.E., and White, F.F. (1996). Bacterial avirulence genes. *Annu Rev Phytopathol* 34, 153-179.
- 818 Lewis, J.D., Wilton, M., Mott, G.A., Lu, W., Hassan, J.A., Guttman, D.S., and Desveaux, D. (2014).  
819 Immunomodulation by the *Pseudomonas syringae* HopZ type III effector family in Arabidopsis.  
820 *PLoS One* 9, e116152.
- 821 Li, H., and Durbin, R. (2009). Fast and accurate short read alignment with Burrows-Wheeler transform.  
822 *Bioinformatics* 25, 1754-1760.
- 823 Lindeberg, M., Cunnac, S., and Collmer, A. (2009). The evolution of *Pseudomonas syringae* host  
824 specificity and type III effector repertoires. *Mol Plant Pathol* 10, 767-775.

- 825 Lindeberg, M., Cunnac, S., and Collmer, A. (2012). *Pseudomonas syringae* type III effector repertoires:  
826 last words in endless arguments. *Trends Microbiol* 20, 199-208.
- 827 Lindeberg, M., Stavrinides, J., Chang, J.H., Alfano, J.R., Collmer, A., Dangl, J.L., Greenberg, J.T.,  
828 Mansfield, J.W., and Guttman, D.S. (2005). Proposed guidelines for a unified nomenclature and  
829 phylogenetic analysis of type III Hop effector proteins in the plant pathogen *Pseudomonas*  
830 *syringae*. *Mol Plant Microbe Interact* 18, 275-282.
- 831 Lovell, H.C., Jackson, R.W., Mansfield, J.W., Godfrey, S.A., Hancock, J.T., Desikan, R., and Arnold,  
832 D.L. (2011). In planta conditions induce genomic changes in *Pseudomonas syringae* pv.  
833 *phaseolicola*. *Mol Plant Pathol* 12, 167-176.
- 834 Lovell, H.C., Mansfield, J.W., Godfrey, S.A., Jackson, R.W., Hancock, J.T., and Arnold, D.L. (2009).  
835 Bacterial evolution by genomic island transfer occurs via DNA transformation in planta. *Curr Biol*  
836 19, 1586-1590.
- 837 Mansfield, J., Genin, S., Magori, S., Citovsky, V., Sriariyanum, M., Ronald, P., Dow, M., Verdier, V.,  
838 Beer, S.V., Machado, M.A., Toth, I., Salmond, G., and Foster, G.D. (2012). Top 10 plant  
839 pathogenic bacteria in molecular plant pathology. *Mol Plant Pathol* 13, 614-629.
- 840 Mansfield, J.W. (2009). From bacterial avirulence genes to effector functions via the hrp delivery  
841 system: an overview of 25 years of progress in our understanding of plant innate immunity. *Mol*  
842 *Plant Pathol* 10, 721-734.
- 843 Markowitz, V.M., Chen, I.M., Palaniappan, K., Chu, K., Szeto, E., Grechkin, Y., Ratner, A., Jacob, B.,  
844 Huang, J., Williams, P., Huntemann, M., Anderson, I., Mavromatis, K., Ivanova, N.N., and  
845 Kyrpides, N.C. (2012). IMG: the Integrated Microbial Genomes database and comparative  
846 analysis system. *Nucleic Acids Res* 40, D115-122.
- 847 Matas, I.M., Castaneda-Ojeda, M.P., Aragon, I.M., Antunez-Lamas, M., Murillo, J., Rodriguez-  
848 Palenzuela, P., Lopez-Solanilla, E., and Ramos, C. (2014). Translocation and functional  
849 analysis of *Pseudomonas savastanoi* pv. *savastanoi* NCPPB 3335 type III secretion system  
850 effectors reveals two novel effector families of the *Pseudomonas syringae* complex. *Mol Plant*  
851 *Microbe Interact* 27, 424-436.
- 852 Mccann, H.C., and Guttman, D.S. (2008). Evolution of the type III secretion system and its effectors in  
853 plant-microbe interactions. *New Phytologist* 177, 33-47.
- 854 Mccann, H.C., Rikkerink, E.H., Bertels, F., Fiers, M., Lu, A., Rees-George, J., Andersen, M.T., Gleave,  
855 A.P., Haubold, B., Wohlers, M.W., Guttman, D.S., Wang, P.W., Straub, C., Vanneste, J.L.,  
856 Rainey, P.B., and Templeton, M.D. (2013). Genomic analysis of the Kiwifruit pathogen  
857 *Pseudomonas syringae* pv. *actinidiae* provides insight into the origins of an emergent plant  
858 disease. *PLoS Pathog* 9, e1003503.
- 859 Michiels, T., and Cornelis, G.R. (1991). Secretion of hybrid proteins by the *Yersinia* Yop export system.  
860 *J Bacteriol* 173, 1677-1685.



- 861 Mohr, T.J., Liu, H., Yan, S., Morris, C.E., Castillo, J.A., Jelenska, J., and Vinatzer, B.A. (2008).  
862 Naturally occurring nonpathogenic isolates of the plant pathogen *Pseudomonas syringae* lack a  
863 type III secretion system and effector gene orthologues. *J Bacteriol* 190, 2858-2870.
- 864 Monteil, C.L., Cai, R., Liu, H., Llontop, M.E., Leman, S., Studholme, D.J., Morris, C.E., and Vinatzer,  
865 B.A. (2013). Nonagricultural reservoirs contribute to emergence and evolution of *Pseudomonas*  
866 *syringae* crop pathogens. *New Phytol* 199, 800-811.
- 867 Monteil, C.L., Yahara, K., Studholme, D.J., Mageiros, L., Meric, G., Swingle, B., Morris, C.E., Vinatzer,  
868 B.A., and Sheppard, S.K. (2016). Population-genomic insights into emergence, crop adaptation  
869 and dissemination of *Pseudomonas syringae* pathogens. *Microb Genom* 2, e000089.
- 870 Morris, C.E., Kinkel, L.L., Xiao, K., Prior, P., and Sands, D.C. (2007). Surprising niche for the plant  
871 pathogen *Pseudomonas syringae*. *Infect Genet Evol* 7, 84-92.
- 872 Morris, C.E., Monteil, C.L., and Berge, O. (2013). The life history of *Pseudomonas syringae*: linking  
873 agriculture to earth system processes. *Annu Rev Phytopathol* 51, 85-104.
- 874 Morris, C.E., Sands, D.C., Vinatzer, B.A., Glaux, C., Guilbaud, C., Buffiere, A., Yan, S., Dominguez, H.,  
875 and Thompson, B.M. (2008). The life history of the plant pathogen *Pseudomonas syringae* is  
876 linked to the water cycle. *ISME J* 2, 321-334.
- 877 Mucyn, T.S., Yourstone, S., Lind, A.L., Biswas, S., Nishimura, M.T., Baltrus, D.A., Cumbie, J.S., Chang,  
878 J.H., Jones, C.D., Dangl, J.L., and Grant, S.R. (2014). Variable suites of non-effector genes are  
879 co-regulated in the type III secretion virulence regulon across the *Pseudomonas syringae*  
880 phylogeny. *PLoS Pathog* 10, e1003807.
- 881 Mukherjee, D., Lambert, J.W., Cooper, R.L., and Kennedy, B.W. (1966). Inheritance of resistance to  
882 bacterial blight (*Pseudomonas glycinea* Coerper) in soybeans ( *Glycine max* L. ). *Crop Science*  
883 6, 324-326.
- 884 Murrell, B., Moola, S., Mabona, A., Weighill, T., Sheward, D., Kosakovsky Pond, S.L., and Scheffler, K.  
885 (2013). FUBAR: a fast, unconstrained bayesian approximation for inferring selection. *Mol Biol*  
886 *Evol* 30, 1196-1205.
- 887 Neale, H.C., Laister, R., Payne, J., Preston, G., Jackson, R.W., and Arnold, D.L. (2016). A low  
888 frequency persistent reservoir of a genomic island in a pathogen population ensures island  
889 survival and improves pathogen fitness in a susceptible host. *Environ Microbiol* 18, 4144-4152.
- 890 O'brien, H.E., Thakur, S., Gong, Y., Fung, P., Zhang, J., Yuan, L., Wang, P.W., Yong, C., Scortichini,  
891 M., and Guttman, D.S. (2012). Extensive remodeling of the *Pseudomonas syringae* pv.  
892 *avellanae* type III secretome associated with two independent host shifts onto hazelnut. *BMC*  
893 *Microbiol* 12, 141.
- 894 O'brien, H.E., Thakur, S., and Guttman, D.S. (2011). Evolution of plant pathogenesis in *Pseudomonas*  
895 *syringae*: a genomics perspective. *Annu Rev Phytopathol* 49, 269-289.



- 896 Oh, H.S., Park, D.H., and Collmer, A. (2010). Components of the *Pseudomonas syringae* type III  
897 secretion system can suppress and may elicit plant innate immunity. *Mol Plant Microbe Interact*  
898 *23*, 727-739.
- 899 Price, M.N., Dehal, P.S., and Arkin, A.P. (2010). FastTree 2--approximately maximum-likelihood trees  
900 for large alignments. *PLoS One* *5*, e9490.
- 901 Rapisarda, C., and Fronzes, R. (2018). Secretion Systems Used by Bacteria to Subvert Host Functions.  
902 *Curr Issues Mol Biol* *25*, 1-42.
- 903 Rohmer, L., Guttman, D.S., and Dangl, J.L. (2004). Diverse evolutionary mechanisms shape the type III  
904 effector virulence factor repertoire in the plant pathogen *Pseudomonas syringae*. *Genetics* *167*,  
905 1341-1360.
- 906 Salmond, G.P., and Reeves, P.J. (1993). Membrane traffic wardens and protein secretion in gram-  
907 negative bacteria. *Trends Biochem Sci* *18*, 7-12.
- 908 Sarkar, S.F., Gordon, J.S., Martin, G.B., and Guttman, D.S. (2006). Comparative genomics of host-  
909 specific virulence in *Pseudomonas syringae*. *Genetics* *174*, 1041-1056.
- 910 Staskawicz, B., Dahlbeck, D., Keen, N., and Napoli, C. (1987). Molecular characterization of cloned  
911 avirulence genes from race 0 and race 1 of *Pseudomonas syringae* pv. *glycinea*. *J Bacteriol*  
912 *169*, 5789-5794.
- 913 Staskawicz, B.J., Dahlbeck, D., and Keen, N.T. (1984). Cloned avirulence gene of *Pseudomonas*  
914 *syringae* pv. *glycinea* determines race-specific incompatibility on *Glycine max* (L.) Merr. *Proc*  
915 *Natl Acad Sci U S A* *81*, 6024-6028.
- 916 Stavrinos, J., and Guttman, D.S. (2004). Nucleotide sequence and evolution of the five-plasmid  
917 complement of the phytopathogen *Pseudomonas syringae* pv. *maculicola* ES4326. *J Bacteriol*  
918 *186*, 5101-5115.
- 919 Stavrinos, J., Ma, W., and Guttman, D.S. (2006). Terminal reassortment drives the quantum evolution  
920 of type III effectors in bacterial pathogens. *PLoS Pathog* *2*, e104.
- 921 Tabari, E., and Su, Z. (2017). PorthoMCL: Parallel orthology prediction using MCL for the realm of  
922 massive genome availability. *Big Data Analytics* *2*, 4.
- 923 Thakur, S., Weir, B.S., and Guttman, D.S. (2016). Phytopathogen Genome Announcement: draft  
924 genome sequences of 62 *Pseudomonas syringae* type and pathotype strains. *Mol Plant Microbe*  
925 *Interact* *29*, 243-246.
- 926 Van Valen, L. (1973). A new evolutionary law. *Evolutionary Theory* *1*, 1-30.
- 927 Vinatzer, B.A., Teitzel, G.M., Lee, M.W., Jelenska, J., Hotton, S., Fairfax, K., Jenrette, J., and  
928 Greenberg, J.T. (2006). The type III effector repertoire of *Pseudomonas syringae* pv. *syringae*  
929 B728a and its role in survival and disease on host and non-host plants. *Mol Microbiol* *62*, 26-44.
- 930 Wattam, A.R., Abraham, D., Dalay, O., Disz, T.L., Driscoll, T., Gabbard, J.L., Gillespie, J.J., Gough, R.,  
931 Hix, D., Kenyon, R., Machi, D., Mao, C., Nordberg, E.K., Olson, R., Overbeek, R., Pusch, G.D.,

932 Shukla, M., Schulman, J., Stevens, R.L., Sullivan, D.E., Vonstein, V., Warren, A., Will, R.,  
933 Wilson, M.J., Yoo, H.S., Zhang, C., Zhang, Y., and Sobral, B.W. (2014). PATRIC, the bacterial  
934 bioinformatics database and analysis resource. *Nucleic Acids Res* 42, D581-591.  
935 Wei, H.L., Zhang, W., and Collmer, A. (2018). Modular study of the type III effector repertoire in  
936 *Pseudomonas syringae* pv. *tomato* DC3000 reveals a matrix of effector interplay in  
937 pathogenesis. *Cell Rep* 23, 1630-1638.  
938 Wernersson, R., and Pedersen, A.G. (2003). RevTrans: Multiple alignment of coding DNA from aligned  
939 amino acid sequences. *Nucleic Acids Res* 31, 3537-3539.  
940 Xin, X.F., Kvitko, B., and He, S.Y. (2018). *Pseudomonas syringae*: what it takes to be a pathogen. *Nat*  
941 *Rev Microbiol* 16, 316-328.  
942 Zhou, J.M., and Chai, J. (2008). Plant pathogenic bacterial type III effectors subdue host responses.  
943 *Curr Opin Microbiol* 11, 179-185.  
944  
945

Table 1: T3SE Families Merged into a New Family

| Families to Merge | New Family <sup>1</sup> |
|-------------------|-------------------------|
| HopAB + HopAY     | HopAB                   |
| HopAT + HopAV     | HopAT                   |
| HopB + HopAC      | HopB                    |
| HopAO + HopD      | HopD                    |
| HopF + HopBB      | HopF                    |
| HopK + AvrRps4    | HopK                    |
| HopW + HopAE      | HopW                    |

The new name was assigned based on the first assigned Hop designation.

946

947

Table 2: New T3SE Families

| Old Name | New Family         |
|----------|--------------------|
| HopX2    | HopBO              |
| HopZ3    | HopBP              |
| HopH3    | HopBQ              |
| HopBN1   | HopBR              |
| HopAV1   | HopBS              |
| HopAB2   | HopBT <sup>1</sup> |
| HopAB2   | HopBU <sup>1</sup> |
| HopAJ2   | HopBV <sup>1</sup> |
| HopBH1   | HopBW <sup>1</sup> |
| HopL1    | HopBX <sup>1</sup> |

<sup>1</sup> These new families only contain a single allele

949 Table 3: Positive Selection among T3SE Families.

| Family | Total Number of Alleles | Number of Unique Alleles <sup>1</sup> | Alignment Length (Codons) | Positively Selected Sites (N) | Positively Selected Sites (%) |
|--------|-------------------------|---------------------------------------|---------------------------|-------------------------------|-------------------------------|
| AvrA   | 27                      | 12                                    | 906                       | 1                             | 0.11                          |
| AvrB   | 277                     | 75                                    | 366                       | 0                             | 0.00                          |
| AvrE   | 608                     | 360                                   | 2248                      | 3                             | 0.13                          |
| AvrPto | 170                     | 33                                    | 275                       | 0                             | 0.00                          |
| AvrRpm | 171                     | 39                                    | 301                       | 0                             | 0.00                          |
| AvrRpt | 25                      | 12                                    | 261                       | 3                             | 1.15                          |
| HopA   | 277                     | 105                                   | 449                       | 0                             | 0.00                          |
| HopB   | 770                     | 362                                   | 2265                      | 0                             | 0.00                          |
| HopC   | 115                     | 28                                    | 271                       | 0                             | 0.00                          |
| HopD   | 587                     | 228                                   | 981                       | 0                             | 0.00                          |
| HopE   | 103                     | 31                                    | 274                       | 0                             | 0.00                          |
| HopF   | 380                     | 125                                   | 385                       | 0                             | 0.00                          |
| HopG   | 190                     | 70                                    | 528                       | 0                             | 0.00                          |
| HopH   | 265                     | 54                                    | 226                       | 2                             | 0.88                          |
| HopI   | 400                     | 166                                   | 601                       | 0                             | 0.00                          |
| HopK   | 156                     | 34                                    | 338                       | 3                             | 0.89                          |
| HopL   | 102                     | 53                                    | 902                       | 1                             | 0.11                          |
| HopM   | 620                     | 223                                   | 1034                      | 2                             | 0.19                          |
| HopN   | 74                      | 25                                    | 350                       | 0                             | 0.00                          |
| HopO   | 227                     | 75                                    | 391                       | 1                             | 0.26                          |
| HopQ   | 304                     | 86                                    | 504                       | 3                             | 0.60                          |
| HopR   | 424                     | 231                                   | 2001                      | 6                             | 0.30                          |
| HopS   | 114                     | 26                                    | 179                       | 2                             | 1.12                          |
| HopT   | 97                      | 34                                    | 398                       | 2                             | 0.50                          |
| HopU   | 15                      | 4                                     | 264                       | 0                             | 0.00                          |
| HopV   | 307                     | 74                                    | 738                       | 2                             | 0.27                          |
| HopW   | 618                     | 219                                   | 1125                      | 1                             | 0.09                          |
| HopX   | 308                     | 83                                    | 452                       | 3                             | 0.66                          |
| HopY   | 201                     | 53                                    | 287                       | 2                             | 0.70                          |
| HopZ   | 396                     | 79                                    | 771                       | 2                             | 0.26                          |
| HopAA  | 752                     | 218                                   | 578                       | 0                             | 0.00                          |

|       |     |     |      |    |      |
|-------|-----|-----|------|----|------|
| HopAB | 553 | 204 | 893  | 5  | 0.56 |
| HopAD | 30  | 12  | 675  | 5  | 0.74 |
| HopAF | 395 | 105 | 289  | 3  | 1.04 |
| HopAG | 347 | 141 | 742  | 17 | 2.29 |
| HopAH | 899 | 317 | 479  | 1  | 0.21 |
| HopAI | 326 | 110 | 268  | 1  | 0.37 |
| HopAL | 33  | 15  | 679  | 0  | 0.00 |
| HopAM | 54  | 15  | 281  | 3  | 1.07 |
| HopAQ | 26  | 8   | 98   | 2  | 2.04 |
| HopAR | 105 | 30  | 312  | 1  | 0.32 |
| HopAS | 421 | 164 | 1396 | 4  | 0.29 |
| HopAT | 604 | 223 | 1858 | 0  | 0.00 |
| HopAU | 243 | 58  | 815  | 0  | 0.00 |
| HopAW | 117 | 18  | 266  | 1  | 0.38 |
| HopAX | 63  | 33  | 448  | 0  | 0.00 |
| HopAZ | 283 | 98  | 340  | 1  | 0.29 |
| HopBA | 43  | 16  | 239  | 0  | 0.00 |
| HopBC | 26  | 9   | 254  | 2  | 0.79 |
| HopBD | 141 | 50  | 304  | 3  | 0.99 |
| HopBE | 11  | 6   | 633  | 0  | 0.00 |
| HopBF | 104 | 25  | 252  | 0  | 0.00 |
| HopBG | 13  | 5   | 134  | 0  | 0.00 |
| HopBH | 84  | 26  | 427  | 1  | 0.23 |
| HopBI | 106 | 31  | 452  | 2  | 0.44 |
| HopBJ | 8   | 6   | 260  | 0  | 0.00 |
| HopBK | 75  | 32  | 89   | 1  | 1.12 |
| HopBL | 94  | 50  | 819  | 0  | 0.00 |
| HopBM | 40  | 10  | 157  | 0  | 0.00 |
| HopBN | 80  | 20  | 301  | 1  | 0.33 |
| HopBO | 93  | 32  | 355  | 1  | 0.28 |
| HopBP | 83  | 31  | 411  | 5  | 1.22 |
| HopBQ | 20  | 3   | 215  | 0  | 0.00 |
| HopBR | 5   | 1   | 133  | 0  | 0.00 |
| HopBS | 3   | 1   | 52   | 0  | 0.00 |
| HopBT | 1   | 1   | 194  | 0  | 0.00 |
| HopBU | 1   | 1   | 190  | 0  | 0.00 |



|       |   |   |     |   |      |
|-------|---|---|-----|---|------|
| HopBV | 1 | 1 | 677 | 0 | 0.00 |
| HopBW | 1 | 1 | 171 | 0 | 0.00 |
| HopBX | 1 | 1 | 182 | 0 | 0.00 |

---

<sup>1</sup> Unique DNA sequences

951 **FIGURE LEGENDS**

952

953 **Figure 1:** Total number of coding T3SEs in each *P. syringae* strain, sorted by phylogroup. Closed  
954 circles represent the number of effectors in each strain, boxes show the first quartile effector count,  
955 median effector count, and third quartile effector count for the whole phylogroup, and whiskers extend  
956 to the highest and lowest effector counts in the phylogroup that are not identified as outliers (>1.5 times  
957 the interquartile range).

958

959 **Figure 2: Interfamily blast hits ( $E < 1e-10$ ) that did not pass our e-value and/or length cut-offs for**  
960 **combining T3SEs into families.** Each superfamily represents a cluster of families that have some  
961 overlapping sequence. Coloured blocks represent the regions of the representative sequence pairs that  
962 are homologous, where the length of the blocks is proportional to the length of the homologous  
963 sequence. Black lines represent the remainder of each representative sequence that is not  
964 homologous, where the length of the lines is proportional to the length of the 5' and 3' non-homologous  
965 regions. Not all families within a superfamily need to contain a significant blast hit with all other families  
966 in the superfamily because they can be homologous to the same intermediate sequence in different  
967 regions.

968

969 **Figure 3:** Heat map demonstrating the proportion of strains in each phylogroup that harbor each of the  
970 T3SE families. Only four T3SE families, AvrE, HopB, HopM, and HopAA are considered part of the soft-  
971 core *P. syringae* complex genome (present in > 95% of strains). Other T3SE families are mostly  
972 sparsely distributed across the *P. syringae* species complex, with several families only being present in  
973 a few phylogroups.

974

975 **Figure 4:** Total number of *P. syringae* strains harboring an allele from each T3SE family. Colour  
976 categories denote the copy number of each effector family in the corresponding strains. While the  
977 majority of families are mostly present in a single copy, some of the more broadly distributed families  
978 have higher copy numbers in a subset of *P. syringae* genomes.

979

980 **Figure 5:** Non-synonymous substitution rate ( $Ka$ ), synonymous substitution rates ( $Ks$ ), and  $Ka/Ks$  ratio  
981 for each T3SE family. All alleles in each family were aligned using MUSCLE v. 3.8 and all pairwise  $Ka$   
982 and  $Ks$  values within each family were calculated using MEGA7 with the Nei-Gojobori Method. Boxes

983 show the first quartile substitution rates, median substitution rates, and third quartile substitution rates  
984 for each family, and whiskers extend to the highest and lowest substitution rates in the family that are  
985 not identified as outliers (>1.5 times the interquartile range). Average pairwise  $Ka$ ,  $Ks$ , and  $Ka/Ks$   
986 values for each family are denoted by red X's.

987

988

989 **Figure 6:** Relationship between the average pairwise non-synonymous substitution rate ( $Ka$ ) (A) and  
990 the average pairwise synonymous substitution rate ( $Ks$ ) (B) for each effector family with the average  
991 core genome synonymous and non-synonymous substitution rates of the corresponding *P. syringae*  
992 strains. Pairwise substitution rates for all sequences within a family were estimated by reverse  
993 translating the effector family and concatenated core genome amino acid alignments, then calculating  
994 pairwise substitution rates in MEGA7 with the Nei-Gojobori Method. Each point on the scatter plot  
995 represents the average of these pairwise rates for a single family and the red dotted lines represent the  
996 null-hypothesis that the substitution rates in the effector family will be the same as the substitution rates  
997 of the core genes in the same collection of genomes.

998

999

1000 **Figure 7:** Expected number of gene gain and gene loss events for each T3SE family. The posterior  
1001 expectation for gain and loss events was estimated for each family on each branch of the *P. syringae*  
1002 core-genome tree using GLOOME with the stochastic mapping approach. The sum of these posterior  
1003 expectations across all branches yields the total expected number of events for each family.

1004

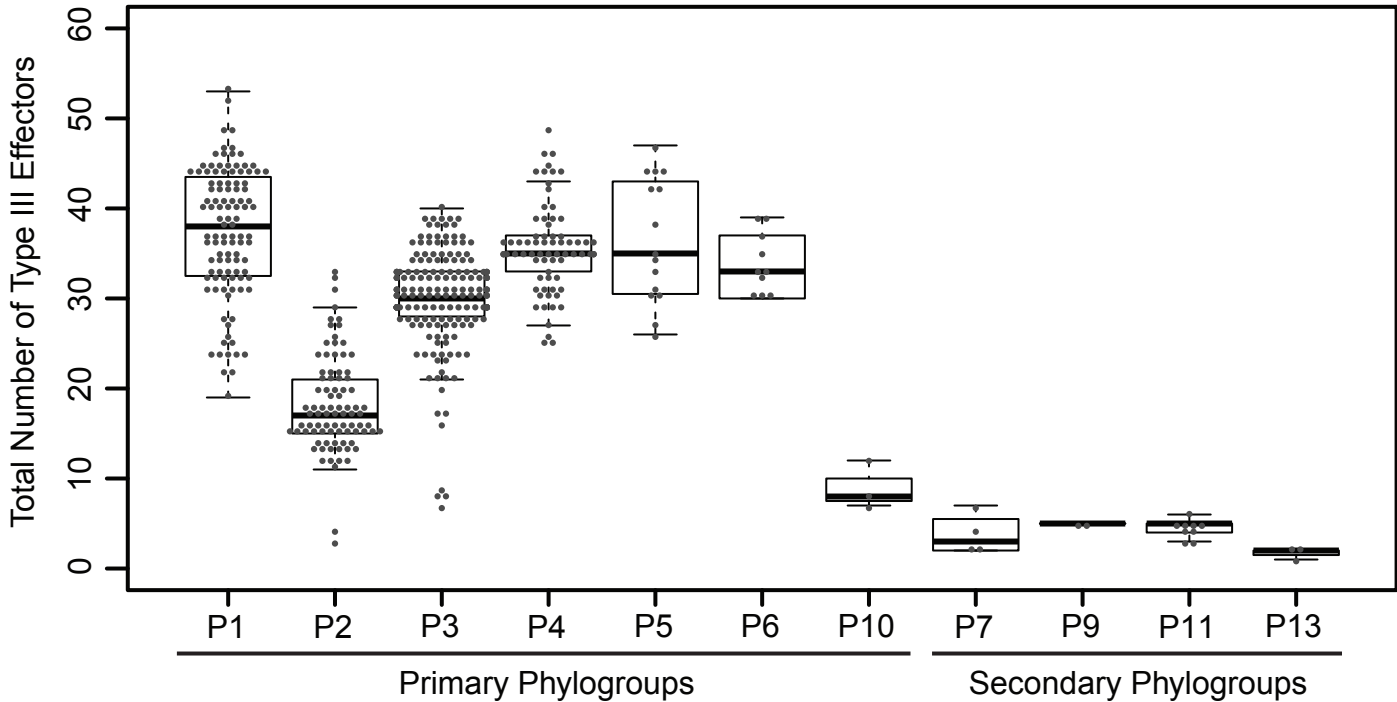

## Superfamily 1

HopL bioRxiv preprint doi: <https://doi.org/10.1101/502210>; this version posted December 21, 2019. The copyright holder for this preprint (which was not certified by peer review) is the author/funder, who has granted bioRxiv a license to display the preprint in perpetuity. It is made available under aCC-BY-NC-ND 4.0 International license.

HopBX

## Superfamily 2

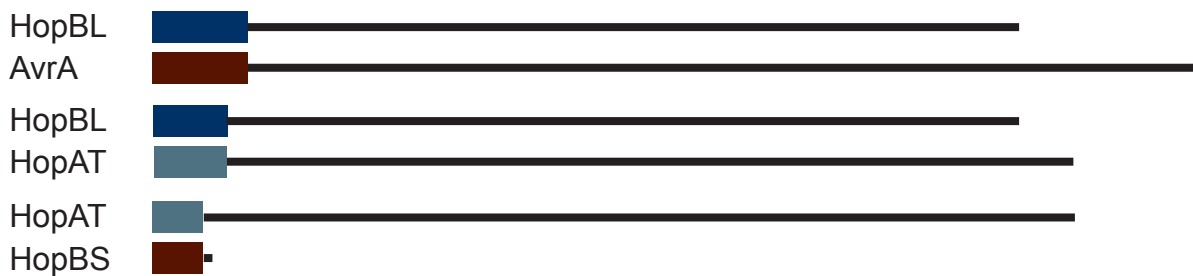

## Superfamily 3

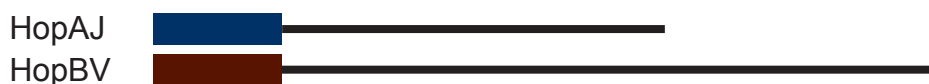

## Superfamily 4

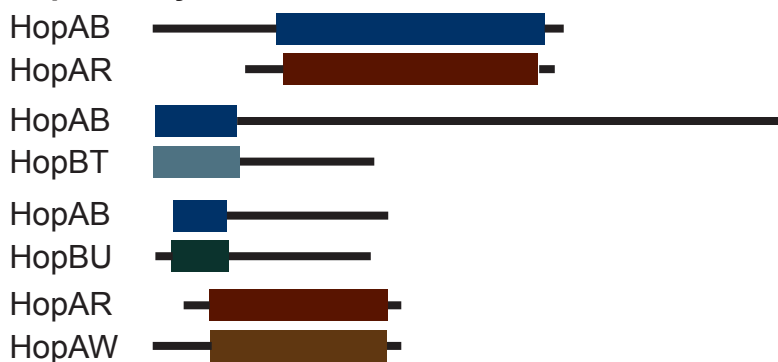

## Scale

300  
Amino  
Acids

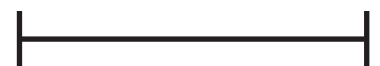

## Superfamily 5

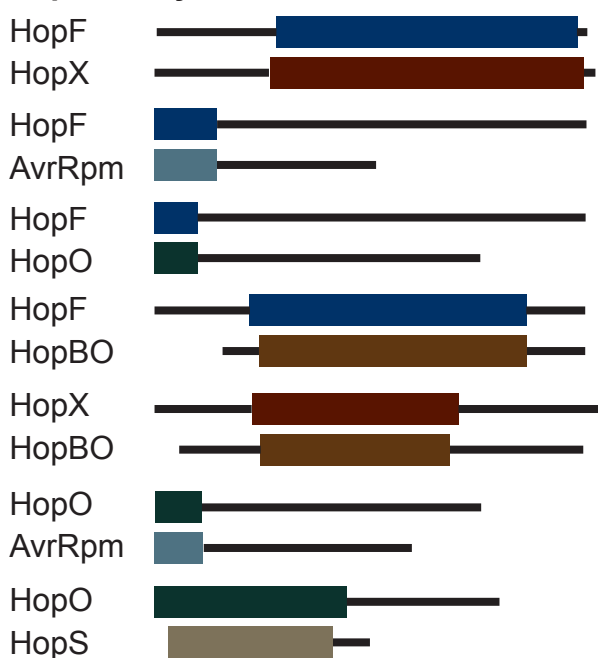

## Superfamily 7

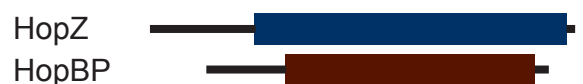

## Superfamily 8

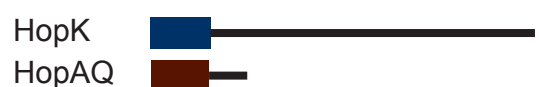

## Superfamily 9

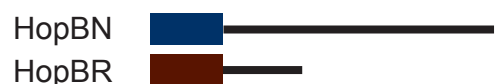

## Superfamily 10

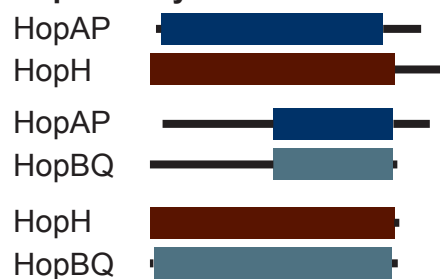

## Superfamily 6

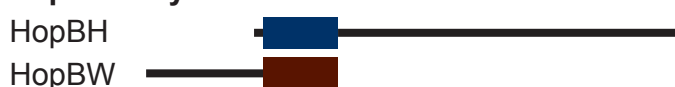



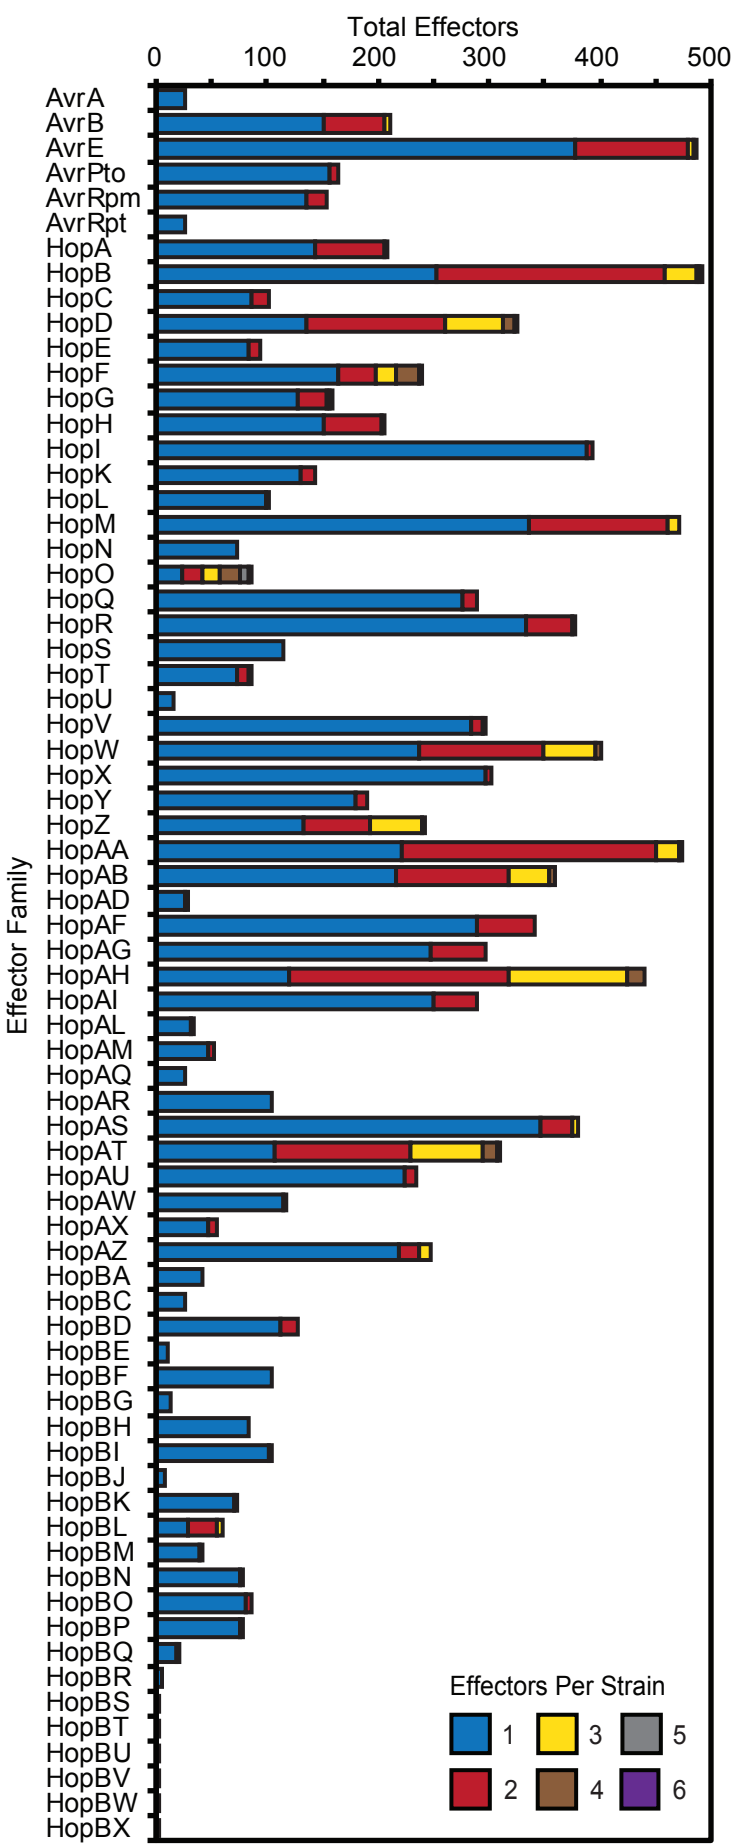

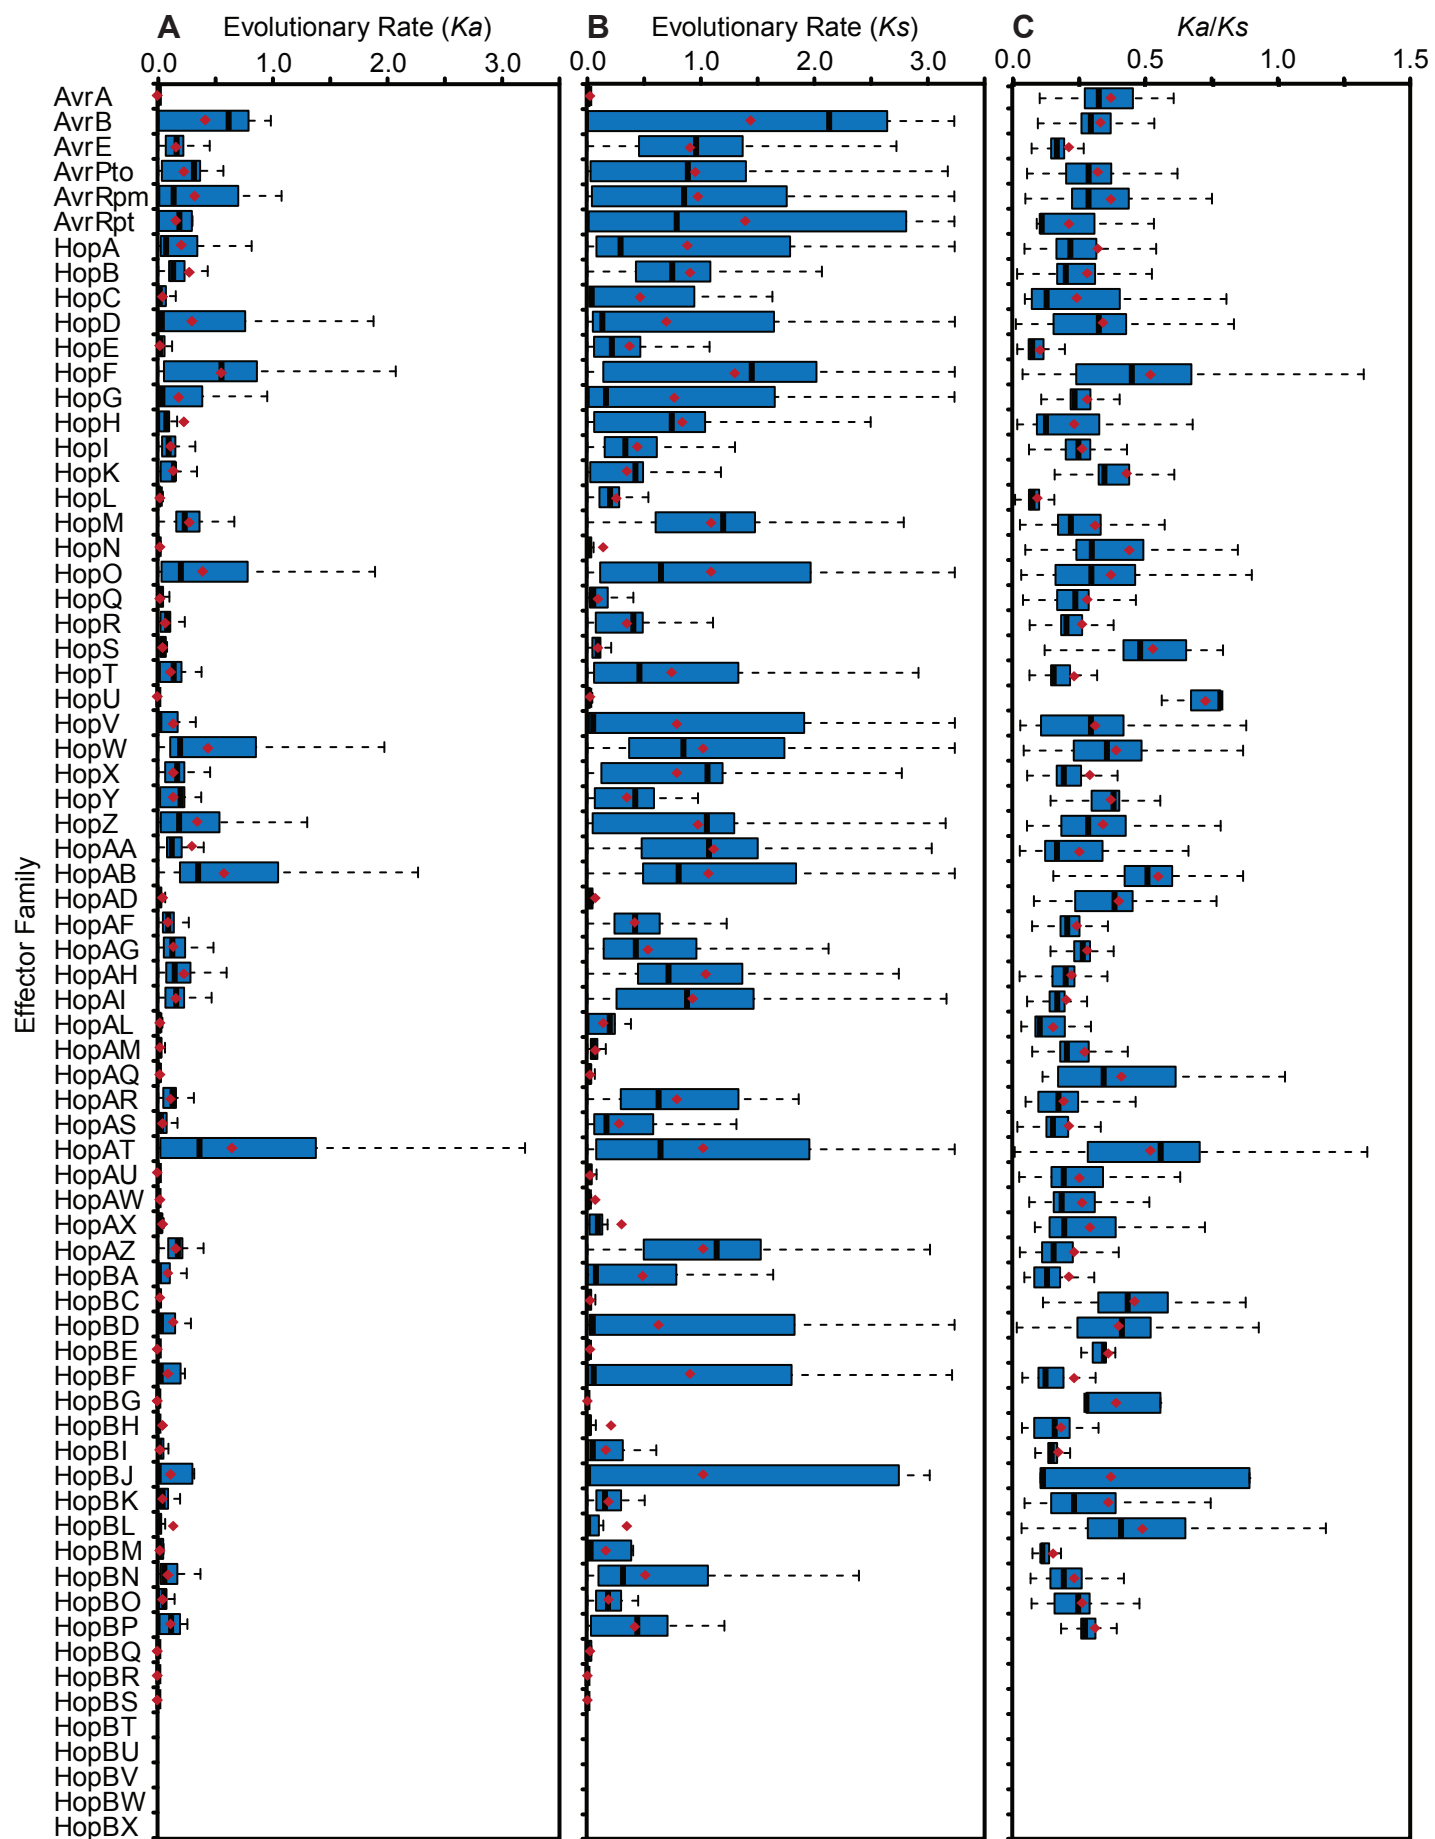



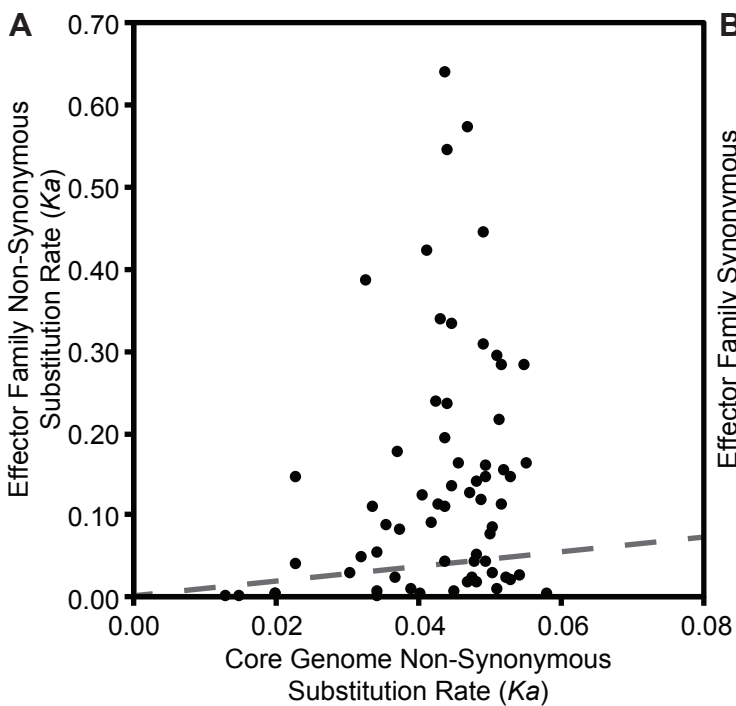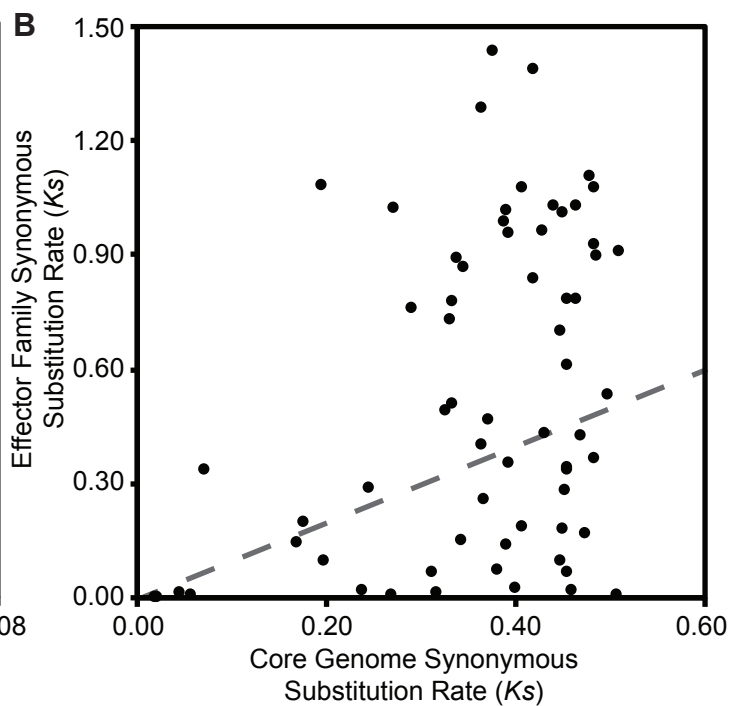

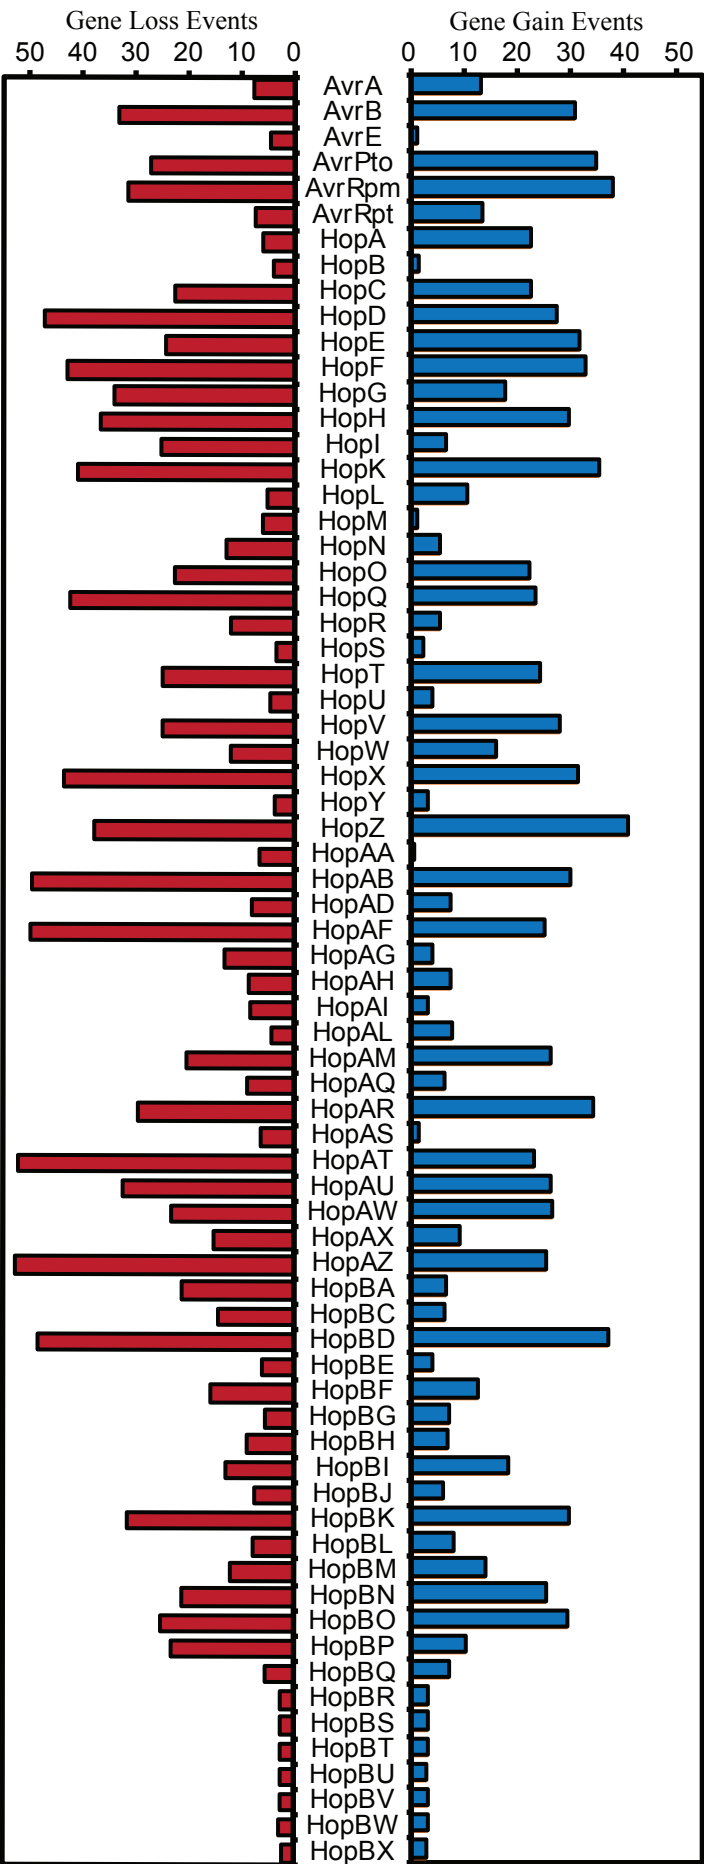

Source: https://www.biorxiv.org/content/10.1101/503219v1.full.pdf
